# Supplementary material for: Increased frequency of repeat expansion mutations across different populations
Source: Nat Med. 2024 Oct 1;30(11):3357–68. doi: 10.1038/s41591-024-03190-5 (PMC11564083; doi:10.1038/s41591-024-03190-5)
Supplement: Supplementary file 2 — Supplementary Tables [file 41591_2024_3190_MOESM2_ESM.xlsx]

## Sheet: Supplementary Tables Index
Table S1. Summary of the sequencing data used in this study.
Table S2. Demographics among WGS datasets.
Table S3. PCR and EH sizes for comparison assessment. EH sizes were corrected after visual inspection. minPCR_a1_type/minEHv322_a1_type, and maxPCR_a2_type/maxEHv322_a2_type can have the following values: Normal, Premutation, Full-mutation or NA.
Table S4. Total number of alleles from Table S3 with an expansion beyond premutation/reduced penetrance and full mutation after visual inspection. Measured by PCR and ExpansionHunter v3.2.2.
Table S5. Count of genomes carrying alleles in the premutation/reduced penetrance and full mutation range, before and after quality control, in the 100K GP and TOPMed cohorts. Count by gene and overall.
Table S6. Frequency of DMPK expansions in patients from both TOPMed and 100K GP with and without cardiovascular disease.
Table S7. Count of premutation/reduced penetrance and full mutation allele carriers (after visual inspection) for X-linked and autosomal dominant loci, in the 100K GP and TOPMed cohorts split by ancestry.
Table S8. Full mutation carrier frequency for recessive REDs (FXN and RFC1 AAGGG), per ancestry and total.
Table S9. Summary of de-identified non-neurological disease participants in the 100K GP and TOPMed cohorts carrying a repeat allele larger than the full mutation range for autosomal dominant and X-linked loci (Table S7), and biallelic expansions in Table S8.
Table S10. Disease prevalence modelling of C9orf72-ALS
Table S11. Disease prevalence modelling of C9orf72-FTD
Table S12. Disease prevalence modelling of DM1
Table S13. Disease prevalence modelling of HD in 40 CAG repeat carriers
Table S14. Disease prevalence modelling of SCA2
Table S15. Disease prevalence modelling of SCA1
Table S16. Disease prevalence modelling of SCA6
Table S17. Count of genomes with alleles larger than premutation (after visual inspection) in the 100K GP and TOPMed, per ancestry. These data were used to generate Fig. 4A.
Table S18. Total number (percentage) of genomes with alleles beyond the premutation threshold across all ancestries and loci in the 100K GP-TOPMed and the 1KGP3 datasets. Note that RFC1 has only been analysed across the 100K GP due to the availability of the code developed by JV.
Table S19. Repeat-size mean;median (Q1-Q3, 99.9th percentile) among all ancestries across the 16 repeats in the 100K GP-TOPMed and in the 1K GP3 dataset.
Table S20. Frequency of intermediate and pathogenic alleles of REDs used for the correlation analysis (Fig. 5B).
Table S21. Repeat-size mean;median (Q1-Q3) of the large REDs in the 1K GP3.
Table S22. Percentiles (0.98, 0.99, and 0.999) after visual inspection across genes in the 1K GP3 cohort.
Table S23. Total number of samples used from TOPMed cohorts, after filtering.
Table S24. Curated coordinates for json files used for genotyping with ExpansionHunter. Genomic coordinates are defined for the region where the repeat motif is located in each gene.

## Sheet: TableS1
Table S1. Summary of the sequencing data used in this study.
Cohort	Chemistry	Instrument model	Read length	Genome build	EH version	Total samples
100K GP	Truseq PCR-free	HiSeq X	2x150bp	38	EHv3.2.2	34190
TOPMed	PCR-Free	HiSeq X Ten	2x150bp	38	EHv3.2.2	47986
1K GP3	PCR-Free	Illumina NovaSeq 6000	2x150bp	38	EHv3.2.2	2504

## Sheet: TableS2
Table S2. Demographics among WGS datasets.
ANALYSIS	Cohort	Total number unrelated genomes (neuro excluded)	Age			Sex Female:male	Super-populations
			Mean	Median	Q1-Q3		AFR	AMR	EAS	EUR	SAS
DISEASE ALLELE CARRIER FREQUENCY	100K GP	34190	50.9	50	39-65	53.5%:46.5%	1211	636	294	29497	2552
	TOPMed	47986	60.88	62	53-70	63.5%:36.5%	11575	5038	972	30071	330
	joint_100KGP_TOPMed	82176	55.9	61	49-70	58.5%:41.5%	12786	5674	1266	59568	2882
REPEAT-LENGTHS DISTRIBUTION	1K GP3	2504	> 18 years			50.8%:49.2%	661	347	504	503	489

## Sheet: TableS3
Table S3. PCR and EH sizes for comparison assessment. EH sizes were corrected after visual inspection.
minPCR_a1_type/minEHv322_a1_type and maxPCR_a2_type/maxEHv322_a2_type can be Normal, Premutation, Full-mutation or NA
EXP in minPCR_a1/maxPCR_a2 denotes alleles with a confirmed expansion where PCR exact size is not available
locus	ID	sex	super-population	minPCR_a1	maxPCR_a2	minEHv322_a1	maxEHv322_a2	minPCR_a1_type	maxPCR_a2_type	minEHv322_a1_type	maxEHv322_a2_type
AR	GE_case1	Male	EUR	23	NA	23	NA	Normal	NA	Normal	NA
AR	GE_case2	Female	AMR	26	27	26	27	Normal	Normal	Normal	Normal
AR	GE_case3	Male	EUR	15	NA	15	NA	Normal	NA	Normal	NA
AR	GE_case4	Male	EUR	20	NA	20	NA	Normal	NA	Normal	NA
AR	GE_case5	Male	EUR	27	NA	27	NA	Normal	NA	Normal	NA
AR	GE_case6	Male	EUR	27	NA	27	NA	Normal	NA	Normal	NA
AR	GE_case7	Male	EUR	18	NA	18	NA	Normal	NA	Normal	NA
AR	GE_case8	Male	AFR	17	NA	17	NA	Normal	NA	Normal	NA
AR	GE_case9	Male	EUR	17	NA	17	NA	Normal	NA	Normal	NA
AR	GE_case10	Female	EUR	24	24	24	24	Normal	Normal	Normal	Normal
AR	GE_case11	Female	EUR	20	25	20	25	Normal	Normal	Normal	Normal
AR	GE_case12	Female	EUR	21	22	21	22	Normal	Normal	Normal	Normal
AR	GE_case13	Male	EUR	21	NA	21	NA	Normal	NA	Normal	NA
AR	GE_case14	Male	EUR	18	NA	18	NA	Normal	NA	Normal	NA
AR	GE_case15	Male	SAS	19	NA	19	NA	Normal	NA	Normal	NA
AR	GE_case16	Male	EUR	20	NA	20	NA	Normal	NA	Normal	NA
AR	GE_case17	Female	EUR	19	21	19	21	Normal	Normal	Normal	Normal
AR	GE_case18	Male	EUR	24	NA	24	NA	Normal	NA	Normal	NA
AR	GE_case19	Female	EUR	19	24	19	24	Normal	Normal	Normal	Normal
AR	GE_case20	Male	EUR	22	NA	22	NA	Normal	NA	Normal	NA
AR	GE_case21	Female	EUR	20	23	20	23	Normal	Normal	Normal	Normal
AR	GE_case22	Female	EUR	21	25	21	25	Normal	Normal	Normal	Normal
AR	GE_case23	Male	EUR	21	NA	21	NA	Normal	NA	Normal	NA
AR	GE_case24	Male	SAS	23	NA	23	NA	Normal	NA	Normal	NA
AR	GE_case25	Male	EUR	41	NA	41	NA	Full-mutation	NA	Full-mutation	NA
AR	GE_case26	Male	EUR	49	NA	49	NA	Full-mutation	NA	Full-mutation	NA
AR	GE_case27	Male	EUR	48	NA	48	NA	Full-mutation	NA	Full-mutation	NA
AR	GE_case28	Female	EUR	22	48	21	49	Normal	Full-mutation	Normal	Full-mutation
AR	GE_case29	Male	EUR	18	NA	18	NA	Normal	NA	Normal	NA
AR	GE_case30	Male	EUR	EXP	NA	41	NA	Full-mutation	NA	Full-mutation	NA
AR	GE_case31	Male	EUR	53	NA	50	NA	Full-mutation	NA	Full-mutation	NA
AR	GE_case32	Female	EUR	22	49	22	45	Normal	Full-mutation	Normal	Full-mutation
AR	GE_case33	Male	EUR	48	NA	49	NA	Full-mutation	NA	Full-mutation	NA
AR	GE_case34	Male	EUR	45	NA	44	NA	Full-mutation	NA	Full-mutation	NA
AR	GE_case35	Male	EUR	43	NA	42	NA	Full-mutation	NA	Full-mutation	NA
AR	GE_case36	Male	EUR	35	NA	36	NA	Premutation	NA	Premutation	NA
AR	GE_case37	Male	EUR	EXP	NA	43	NA	Full-mutation	NA	Full-mutation	NA
ATN1	GE_case38	Male	EUR	8	16	8	16	Normal	Normal	Normal	Normal
ATN1	GE_case39	Female	AMR	8	9	8	9	Normal	Normal	Normal	Normal
ATN1	GE_case40	Male	EUR	16	16	16	16	Normal	Normal	Normal	Normal
ATN1	GE_case41	Male	EUR	8	16	8	16	Normal	Normal	Normal	Normal
ATN1	GE_case42	Male	EUR	8	15	8	15	Normal	Normal	Normal	Normal
ATN1	GE_case43	Male	EUR	14	16	14	16	Normal	Normal	Normal	Normal
ATN1	GE_case44	Male	EUR	12	16	12	16	Normal	Normal	Normal	Normal
ATN1	GE_case45	Male	AFR	13	16	13	16	Normal	Normal	Normal	Normal
ATN1	GE_case46	Male	EUR	15	24	15	24	Normal	Normal	Normal	Normal
ATN1	GE_case47	Female	EUR	14	17	14	17	Normal	Normal	Normal	Normal
ATN1	GE_case48	Female	EUR	15	16	15	16	Normal	Normal	Normal	Normal
ATN1	GE_case49	Female	EUR	15	16	15	16	Normal	Normal	Normal	Normal
ATN1	GE_case50	Male	EUR	11	13	11	13	Normal	Normal	Normal	Normal
ATN1	GE_case51	Male	EUR	8	15	8	15	Normal	Normal	Normal	Normal
ATN1	GE_case52	Male	SAS	8	16	8	16	Normal	Normal	Normal	Normal
ATN1	GE_case53	Male	EUR	8	15	8	15	Normal	Normal	Normal	Normal
ATN1	GE_case54	Female	EUR	8	16	8	16	Normal	Normal	Normal	Normal
ATN1	GE_case55	Female	EUR	10	15	10	15	Normal	Normal	Normal	Normal
ATN1	GE_case56	Male	EUR	10	15	10	15	Normal	Normal	Normal	Normal
ATN1	GE_case57	Female	EUR	15	17	15	17	Normal	Normal	Normal	Normal
ATN1	GE_case58	Female	EUR	15	16	15	16	Normal	Normal	Normal	Normal
ATN1	GE_case59	Male	EUR	8	14	8	14	Normal	Normal	Normal	Normal
ATN1	GE_case60	Male	SAS	15	17	15	17	Normal	Normal	Normal	Normal
ATN1	GE_case61	Male	SAS	7	7	7	7	Normal	Normal	Normal	Normal
ATN1	GE_case62	Female	EUR	10	16	10	16	Normal	Normal	Normal	Normal
ATN1	GE_case63	Female	EUR	16	20	16	20	Normal	Normal	Normal	Normal
ATN1	GE_case64	Male	EUR	15	60	19	60	Normal	Full-mutation	Normal	Full-mutation
ATN1	GE_case65	Female	EUR	10	69	14	70	Normal	Full-mutation	Normal	Full-mutation
ATN1	GE_case66	Male	EUR	17	63	17	80	Normal	Full-mutation	Normal	Full-mutation
ATN1	GE_case67	Male	EUR	17	62	17	93	Normal	Full-mutation	Normal	Full-mutation
ATN1	GE_case68	Male	EUR	21	54	21	60	Normal	Full-mutation	Normal	Full-mutation
ATN1	GE_case69	Female	EUR	20	54	20	48	Normal	Full-mutation	Normal	Full-mutation
ATN1	GE_case70	Male	EUR	21	54	21	52	Normal	Full-mutation	Normal	Full-mutation
ATN1	GE_case71	Female	EUR	15	55	19	55	Normal	Full-mutation	Normal	Full-mutation
ATXN1	GE_case72	Male	EUR	29	31	29	31	Normal	Normal	Normal	Normal
ATXN1	GE_case73	Female	AMR	29	30	29	30	Normal	Normal	Normal	Normal
ATXN1	GE_case74	Male	EUR	29	30	30	30	Normal	Normal	Normal	Normal
ATXN1	GE_case75	Male	EUR	29	31	29	29	Normal	Normal	Normal	Normal
ATXN1	GE_case76	Male	EUR	29	29	29	29	Normal	Normal	Normal	Normal
ATXN1	GE_case77	Male	EUR	29	29	29	29	Normal	Normal	Normal	Normal
ATXN1	GE_case78	Male	EUR	30	30	30	30	Normal	Normal	Normal	Normal
ATXN1	GE_case79	Male	AFR	27	28	28	28	Normal	Normal	Normal	Normal
ATXN1	GE_case80	Male	EUR	29	30	29	29	Normal	Normal	Normal	Normal
ATXN1	GE_case81	Female	EUR	30	31	30	31	Normal	Normal	Normal	Normal
ATXN1	GE_case82	Female	EUR	32	32	31	31	Normal	Normal	Normal	Normal
ATXN1	GE_case83	Female	EUR	29	31	31	31	Normal	Normal	Normal	Normal
ATXN1	GE_case84	Male	EUR	30	36	30	36	Normal	Normal	Normal	Normal
ATXN1	GE_case85	Male	EUR	31	32	31	31	Normal	Normal	Normal	Normal
ATXN1	GE_case86	Male	SAS	27	35	27	35	Normal	Normal	Normal	Normal
ATXN1	GE_case87	Male	EUR	28	29	28	29	Normal	Normal	Normal	Normal
ATXN1	GE_case88	Female	EUR	29	30	29	30	Normal	Normal	Normal	Normal
ATXN1	GE_case89	Female	EUR	28	36	28	36	Normal	Normal	Normal	Normal
ATXN1	GE_case90	Male	EUR	30	30	30	30	Normal	Normal	Normal	Normal
ATXN1	GE_case91	Female	EUR	28	29	28	29	Normal	Normal	Normal	Normal
ATXN1	GE_case92	Female	EUR	28	29	29	34	Normal	Normal	Normal	Normal
ATXN1	GE_case93	Male	EUR	30	31	30	31	Normal	Normal	Normal	Normal
ATXN1	GE_case94	Male	SAS	29	29	29	29	Normal	Normal	Normal	Normal
ATXN1	GE_case95	Female	EUR	30	36	30	36	Normal	Normal	Normal	Normal
ATXN1	GE_case96	Male	SAS	29	31	29	31	Normal	Normal	Normal	Normal
ATXN1	GE_case97	Female	EUR	30	36	30	36	Normal	Normal	Normal	Normal
ATXN1	GE_case98	Female	AFR	28	37	28	37	Normal	Normal	Normal	Normal
ATXN1	GE_case99	Female	EUR	30	35	30	35	Normal	Normal	Normal	Normal
ATXN1	GE_case100	Female	EUR	30	36	30	36	Normal	Normal	Normal	Normal
ATXN1	GE_case101	Male	EUR	29	38	29	38	Normal	Normal	Normal	Normal
ATXN1	GE_case102	Female	SAS	30	35	30	35	Normal	Normal	Normal	Normal
ATXN1	GE_case103	Female	EUR	31	35	31	35	Normal	Normal	Normal	Normal
ATXN1	GE_case104	Female	EUR	31	35	31	35	Normal	Normal	Normal	Normal
ATXN1	GE_case105	Male	EUR	30	36	30	36	Normal	Normal	Normal	Normal
ATXN1	GE_case106	Male	EUR	32	35	32	35	Normal	Normal	Normal	Normal
ATXN1	GE_case107	Male	EUR	30	32	30	32	Normal	Normal	Normal	Normal
ATXN1	GE_case108	Male	EUR	31	31	31	31	Normal	Normal	Normal	Normal
ATXN1	GE_case109	Male	EUR	32	35	32	35	Normal	Normal	Normal	Normal
ATXN1	GE_case110	Male	EUR	30	37	30	37	Normal	Normal	Normal	Normal
ATXN1	GE_case111	Male	EUR	30	31	30	31	Normal	Normal	Normal	Normal
ATXN1	GE_case112	Male	SAS	27	35	27	35	Normal	Normal	Normal	Normal
ATXN1	GE_case113	Female	AFR	32	33	32	33	Normal	Normal	Normal	Normal
ATXN1	GE_case114	Male	SAS	29	36	29	36	Normal	Normal	Normal	Normal
ATXN1	GE_case115	Female	EUR	29	35	29	35	Normal	Normal	Normal	Normal
ATXN1	GE_case116	Female	EUR	29	30	29	30	Normal	Normal	Normal	Normal
ATXN1	GE_case117	Male	EUR	30	36	31	36	Normal	Normal	Normal	Normal
ATXN1	GE_case118	Male	SAS	30	32	30	32	Normal	Normal	Normal	Normal
ATXN1	GE_case119	Female	EUR	30	31	30	31	Normal	Normal	Normal	Normal
ATXN1	GE_case120	Male	EUR	30	35	30	35	Normal	Normal	Normal	Normal
ATXN1	GE_case121	Male	EUR	29	35	29	35	Normal	Normal	Normal	Normal
ATXN1	GE_case122	Female	EUR	27	35	27	35	Normal	Normal	Normal	Normal
ATXN1	GE_case123	Female	EUR	30	36	30	36	Normal	Normal	Normal	Normal
ATXN1	GE_case124	Male	SAS	30	30	30	30	Normal	Normal	Normal	Normal
ATXN1	GE_case125	Male	EUR	30	37	30	37	Normal	Normal	Normal	Normal
ATXN1	GE_case126	Female	SAS	30	31	30	31	Normal	Normal	Normal	Normal
ATXN1	GE_case127	Male	AMR	31	33	31	33	Normal	Normal	Normal	Normal
ATXN1	GE_case128	Female	EUR	30	30	30	30	Normal	Normal	Normal	Normal
ATXN1	GE_case129	Female	EUR	30	30	31	31	Normal	Normal	Normal	Normal
ATXN1	GE_case130	Male	EUR	31	33	29	30	Normal	Normal	Normal	Normal
ATXN1	GE_case131	Female	EUR	30	31	30	31	Normal	Normal	Normal	Normal
ATXN1	GE_case132	Male	EUR	30	33	31	33	Normal	Normal	Normal	Normal
ATXN1	GE_case133	Male	EUR	28	31	28	31	Normal	Normal	Normal	Normal
ATXN1	GE_case134	Male	AMR	31	31	26	31	Normal	Normal	Normal	Normal
ATXN1	GE_case135	Male	EUR	30	35	30	35	Normal	Normal	Normal	Normal
ATXN1	GE_case136	Male	SAS	29	30	29	30	Normal	Normal	Normal	Normal
ATXN1	GE_case137	Male	SAS	29	31	29	31	Normal	Normal	Normal	Normal
ATXN1	GE_case138	Male	AFR	26	30	26	30	Normal	Normal	Normal	Normal
ATXN1	GE_case139	Female	SAS	30	32	30	32	Normal	Normal	Normal	Normal
ATXN1	GE_case140	Male	SAS	29	31	29	31	Normal	Normal	Normal	Normal
ATXN1	GE_case141	Male	SAS	28	30	28	30	Normal	Normal	Normal	Normal
ATXN1	GE_case142	Female	AFR	28	33	28	33	Normal	Normal	Normal	Normal
ATXN1	GE_case143	Female	SAS	31	32	31	32	Normal	Normal	Normal	Normal
ATXN1	GE_case144	Female	SAS	31	31	31	31	Normal	Normal	Normal	Normal
ATXN1	GE_case145	Male	EUR	30	30	30	32	Normal	Normal	Normal	Normal
ATXN1	GE_case146	Female	EUR	30	31	29	29	Normal	Normal	Normal	Normal
ATXN1	GE_case147	Female	EUR	27	44	27	44	Normal	Full-mutation	Normal	Full-mutation
ATXN2	GE_case148	Male	EUR	22	22	22	22	Normal	Normal	Normal	Normal
ATXN2	GE_case149	Female	AMR	22	22	22	22	Normal	Normal	Normal	Normal
ATXN2	GE_case150	Male	EUR	22	22	22	22	Normal	Normal	Normal	Normal
ATXN2	GE_case151	Male	EUR	22	27	22	27	Normal	Normal	Normal	Normal
ATXN2	GE_case152	Male	EUR	22	22	22	22	Normal	Normal	Normal	Normal
ATXN2	GE_case153	Male	EUR	17	22	17	22	Normal	Normal	Normal	Normal
ATXN2	GE_case154	Male	EUR	22	22	22	22	Normal	Normal	Normal	Normal
ATXN2	GE_case155	Male	AFR	21	21	22	22	Normal	Normal	Normal	Normal
ATXN2	GE_case156	Male	EUR	22	22	22	22	Normal	Normal	Normal	Normal
ATXN2	GE_case157	Female	EUR	22	22	22	22	Normal	Normal	Normal	Normal
ATXN2	GE_case158	Female	EUR	22	22	22	22	Normal	Normal	Normal	Normal
ATXN2	GE_case159	Female	EUR	22	22	22	22	Normal	Normal	Normal	Normal
ATXN2	GE_case160	Male	EUR	22	23	22	23	Normal	Normal	Normal	Normal
ATXN2	GE_case161	Male	EUR	22	22	22	22	Normal	Normal	Normal	Normal
ATXN2	GE_case162	Male	SAS	22	22	22	22	Normal	Normal	Normal	Normal
ATXN2	GE_case163	Male	EUR	19	22	19	22	Normal	Normal	Normal	Normal
ATXN2	GE_case164	Female	EUR	22	22	22	22	Normal	Normal	Normal	Normal
ATXN2	GE_case165	Female	EUR	22	22	22	22	Normal	Normal	Normal	Normal
ATXN2	GE_case166	Male	EUR	22	22	22	22	Normal	Normal	Normal	Normal
ATXN2	GE_case167	Female	EUR	22	22	22	22	Normal	Normal	Normal	Normal
ATXN2	GE_case168	Female	EUR	22	22	22	22	Normal	Normal	Normal	Normal
ATXN2	GE_case169	Male	EUR	22	23	23	23	Normal	Normal	Normal	Normal
ATXN2	GE_case170	Male	SAS	22	22	22	22	Normal	Normal	Normal	Normal
ATXN2	GE_case171	Male	SAS	22	22	22	22	Normal	Normal	Normal	Normal
ATXN2	GE_case172	Female	AFR	22	22	22	22	Normal	Normal	Normal	Normal
ATXN2	GE_case173	Female	EUR	22	31	22	31	Normal	Normal	Normal	Normal
ATXN2	GE_case174	Male	EUR	27	30	27	31	Normal	Normal	Normal	Normal
ATXN2	GE_case175	Male	EUR	22	22	22	22	Normal	Normal	Normal	Normal
ATXN2	GE_case176	Male	EUR	22	32	22	32	Normal	Normal	Normal	Normal
ATXN2	GE_case177	Male	SAS	22	22	22	22	Normal	Normal	Normal	Normal
ATXN2	GE_case178	Male	EUR	22	22	22	22	Normal	Normal	Normal	Normal
ATXN2	GE_case179	Male	AFR	23	29	23	29	Normal	Normal	Normal	Normal
ATXN2	GE_case180	Male	EUR	22	22	22	22	Normal	Normal	Normal	Normal
ATXN2	GE_case181	Male	SAS	23	23	22	22	Normal	Normal	Normal	Normal
ATXN2	GE_case182	Female	AFR	22	22	22	22	Normal	Normal	Normal	Normal
ATXN2	GE_case183	Female	EUR	22	22	22	22	Normal	Normal	Normal	Normal
ATXN2	GE_case184	Female	AFR	22	22	22	23	Normal	Normal	Normal	Normal
ATXN2	GE_case185	Female	AFR	22	23	22	23	Normal	Normal	Normal	Normal
ATXN2	GE_case186	Male	SAS	23	23	22	22	Normal	Normal	Normal	Normal
ATXN2	GE_case187	Male	SAS	22	22	22	22	Normal	Normal	Normal	Normal
ATXN2	GE_case188	Female	SAS	23	23	22	22	Normal	Normal	Normal	Normal
ATXN2	GE_case189	Male	AMR	23	24	22	23	Normal	Normal	Normal	Normal
ATXN2	GE_case190	Female	EUR	23	24	22	23	Normal	Normal	Normal	Normal
ATXN2	GE_case191	Male	EUR	22	22	22	22	Normal	Normal	Normal	Normal
ATXN2	GE_case192	Male	AMR	23	23	22	22	Normal	Normal	Normal	Normal
ATXN2	GE_case193	Male	SAS	23	23	22	22	Normal	Normal	Normal	Normal
ATXN2	GE_case194	Male	SAS	22	33	22	34	Normal	Premutation	Normal	Premutation
ATXN2	GE_case195	Male	SAS	22	22	22	22	Normal	Normal	Normal	Normal
ATXN2	GE_case196	Female	AFR	22	22	22	22	Normal	Normal	Normal	Normal
ATXN2	GE_case197	Male	AFR	22	22	22	22	Normal	Normal	Normal	Normal
ATXN2	GE_case198	Female	SAS	22	22	22	22	Normal	Normal	Normal	Normal
ATXN2	GE_case199	Male	SAS	22	22	22	22	Normal	Normal	Normal	Normal
ATXN2	GE_case200	Male	SAS	23	23	22	22	Normal	Normal	Normal	Normal
ATXN2	GE_case201	Female	AFR	23	24	22	23	Normal	Normal	Normal	Normal
ATXN2	GE_case202	Female	SAS	22	22	22	22	Normal	Normal	Normal	Normal
ATXN2	GE_case203	Female	SAS	22	22	22	22	Normal	Normal	Normal	Normal
ATXN2	GE_case204	Female	EUR	22	EXP	22	115	Normal	Full-mutation	Normal	Full-mutation
ATXN2	GE_case205	Female	EUR	31	41	31	36	Normal	Full-mutation	Normal	Full-mutation
ATXN2	GE_case206	Male	EUR	22	38	22	40	Normal	Full-mutation	Normal	Full-mutation
ATXN2	GE_case207	Male	EUR	22	EXP	22	42	Normal	Full-mutation	Normal	Full-mutation
ATXN2	GE_case208	Female	SAS	22	42	22	39	Normal	Full-mutation	Normal	Full-mutation
ATXN3	GE_case209	Male	EUR	14	23	11	20	Normal	Normal	Normal	Normal
ATXN3	GE_case210	Female	AMR	14	21	11	18	Normal	Normal	Normal	Normal
ATXN3	GE_case211	Male	EUR	14	20	11	17	Normal	Normal	Normal	Normal
ATXN3	GE_case212	Male	EUR	22	23	19	20	Normal	Normal	Normal	Normal
ATXN3	GE_case213	Male	EUR	14	14	11	11	Normal	Normal	Normal	Normal
ATXN3	GE_case214	Male	EUR	14	21	11	18	Normal	Normal	Normal	Normal
ATXN3	GE_case215	Male	EUR	23	23	20	20	Normal	Normal	Normal	Normal
ATXN3	GE_case216	Male	AFR	23	35	20	32	Normal	Normal	Normal	Normal
ATXN3	GE_case217	Male	EUR	26	27	23	24	Normal	Normal	Normal	Normal
ATXN3	GE_case218	Female	EUR	23	27	20	24	Normal	Normal	Normal	Normal
ATXN3	GE_case219	Female	EUR	14	24	11	21	Normal	Normal	Normal	Normal
ATXN3	GE_case220	Female	EUR	23	23	20	20	Normal	Normal	Normal	Normal
ATXN3	GE_case221	Male	EUR	23	27	20	24	Normal	Normal	Normal	Normal
ATXN3	GE_case222	Male	EUR	27	29	24	26	Normal	Normal	Normal	Normal
ATXN3	GE_case223	Male	SAS	23	28	23	28	Normal	Normal	Normal	Normal
ATXN3	GE_case224	Male	EUR	23	23	20	20	Normal	Normal	Normal	Normal
ATXN3	GE_case225	Female	EUR	22	28	19	25	Normal	Normal	Normal	Normal
ATXN3	GE_case226	Female	EUR	14	23	11	20	Normal	Normal	Normal	Normal
ATXN3	GE_case227	Male	EUR	14	23	11	20	Normal	Normal	Normal	Normal
ATXN3	GE_case228	Female	EUR	23	23	20	20	Normal	Normal	Normal	Normal
ATXN3	GE_case229	Female	EUR	14	14	11	11	Normal	Normal	Normal	Normal
ATXN3	GE_case230	Male	EUR	21	23	18	20	Normal	Normal	Normal	Normal
ATXN3	GE_case231	Male	SAS	19	24	19	24	Normal	Normal	Normal	Normal
ATXN3	GE_case232	Male	SAS	14	26	14	26	Normal	Normal	Normal	Normal
ATXN3	GE_case233	Female	AFR	31	32	29	30	Normal	Normal	Normal	Normal
ATXN3	GE_case234	Male	EUR	14	22	11	20	Normal	Normal	Normal	Normal
ATXN3	GE_case235	Male	EUR	20	20	18	18	Normal	Normal	Normal	Normal
ATXN3	GE_case236	Male	EUR	14	26	11	24	Normal	Normal	Normal	Normal
ATXN3	GE_case237	Male	SAS	23	27	21	25	Normal	Normal	Normal	Normal
ATXN3	GE_case238	Female	AFR	22	26	20	24	Normal	Normal	Normal	Normal
ATXN3	GE_case239	Female	EUR	14	26	11	24	Normal	Normal	Normal	Normal
ATXN3	GE_case240	Male	SAS	22	27	20	25	Normal	Normal	Normal	Normal
ATXN3	GE_case241	Male	SAS	18	23	16	21	Normal	Normal	Normal	Normal
ATXN3	GE_case242	Female	SAS	14	19	11	16	Normal	Normal	Normal	Normal
ATXN3	GE_case243	Male	AMR	14	22	11	20	Normal	Normal	Normal	Normal
ATXN3	GE_case244	Female	EUR	14	27	11	25	Normal	Normal	Normal	Normal
ATXN3	GE_case245	Male	EUR	22	22	20	20	Normal	Normal	Normal	Normal
ATXN3	GE_case246	Male	AMR	14	29	11	27	Normal	Normal	Normal	Normal
ATXN3	GE_case247	Male	SAS	14	26	11	24	Normal	Normal	Normal	Normal
ATXN3	GE_case248	Male	SAS	14	14	11	11	Normal	Normal	Normal	Normal
ATXN3	GE_case249	Female	SAS	20	22	18	20	Normal	Normal	Normal	Normal
ATXN3	GE_case250	Male	SAS	22	22	20	20	Normal	Normal	Normal	Normal
ATXN3	GE_case251	Female	SAS	25	26	23	24	Normal	Normal	Normal	Normal
ATXN3	GE_case252	Female	SAS	21	22	19	20	Normal	Normal	Normal	Normal
ATXN3	GE_case253	Male	EUR	25	67	26	70	Normal	Full-mutation	Normal	Full-mutation
ATXN3	GE_case254	Female	EUR	30	63	30	68	Normal	Full-mutation	Normal	Full-mutation
ATXN3	GE_case255	Male	EUR	25	61	25	60	Normal	Full-mutation	Normal	Full-mutation
ATXN3	GE_case256	Female	EUR	24	60	24	48	Normal	Full-mutation	Normal	Premutation
ATXN7	GE_case257	Male	EUR	10	10	10	10	Normal	Normal	Normal	Normal
ATXN7	GE_case258	Female	AMR	10	12	10	12	Normal	Normal	Normal	Normal
ATXN7	GE_case259	Male	EUR	10	12	10	12	Normal	Normal	Normal	Normal
ATXN7	GE_case260	Male	EUR	10	10	10	10	Normal	Normal	Normal	Normal
ATXN7	GE_case261	Male	EUR	10	12	10	12	Normal	Normal	Normal	Normal
ATXN7	GE_case262	Male	EUR	10	12	10	12	Normal	Normal	Normal	Normal
ATXN7	GE_case263	Male	EUR	10	12	10	12	Normal	Normal	Normal	Normal
ATXN7	GE_case264	Male	AFR	10	11	10	11	Normal	Normal	Normal	Normal
ATXN7	GE_case265	Male	EUR	10	10	10	10	Normal	Normal	Normal	Normal
ATXN7	GE_case266	Female	EUR	10	13	10	13	Normal	Normal	Normal	Normal
ATXN7	GE_case267	Female	EUR	7	10	7	10	Normal	Normal	Normal	Normal
ATXN7	GE_case268	Female	EUR	10	10	10	10	Normal	Normal	Normal	Normal
ATXN7	GE_case269	Male	EUR	10	12	10	12	Normal	Normal	Normal	Normal
ATXN7	GE_case270	Male	EUR	10	12	10	12	Normal	Normal	Normal	Normal
ATXN7	GE_case271	Male	SAS	10	12	10	12	Normal	Normal	Normal	Normal
ATXN7	GE_case272	Male	EUR	10	10	10	10	Normal	Normal	Normal	Normal
ATXN7	GE_case273	Female	EUR	10	10	10	10	Normal	Normal	Normal	Normal
ATXN7	GE_case274	Female	EUR	10	11	10	11	Normal	Normal	Normal	Normal
ATXN7	GE_case275	Male	EUR	10	10	10	10	Normal	Normal	Normal	Normal
ATXN7	GE_case276	Female	EUR	10	10	10	10	Normal	Normal	Normal	Normal
ATXN7	GE_case277	Female	EUR	11	12	10	12	Normal	Normal	Normal	Normal
ATXN7	GE_case278	Male	EUR	10	10	10	10	Normal	Normal	Normal	Normal
ATXN7	GE_case279	Male	SAS	10	10	10	10	Normal	Normal	Normal	Normal
ATXN7	GE_case280	Male	SAS	12	12	10	10	Normal	Normal	Normal	Normal
ATXN7	GE_case281	Female	AFR	13	14	11	12	Normal	Normal	Normal	Normal
ATXN7	GE_case282	Male	EUR	12	12	10	10	Normal	Normal	Normal	Normal
ATXN7	GE_case283	Male	EUR	7	12	7	12	Normal	Normal	Normal	Normal
ATXN7	GE_case284	Female	EUR	10	46	10	52	Normal	Full-mutation	Normal	Full-mutation
ATXN7	GE_case285	Male	EUR	10	10	10	10	Normal	Normal	Normal	Normal
ATXN7	GE_case286	Male	SAS	12	12	10	10	Normal	Normal	Normal	Normal
ATXN7	GE_case287	Female	AFR	13	13	11	11	Normal	Normal	Normal	Normal
ATXN7	GE_case288	Female	EUR	11	11	10	10	Normal	Normal	Normal	Normal
ATXN7	GE_case289	Male	SAS	12	12	10	10	Normal	Normal	Normal	Normal
ATXN7	GE_case290	Male	SAS	11	12	10	11	Normal	Normal	Normal	Normal
ATXN7	GE_case291	Female	SAS	12	12	10	10	Normal	Normal	Normal	Normal
ATXN7	GE_case292	Male	AMR	12	12	10	10	Normal	Normal	Normal	Normal
ATXN7	GE_case293	Female	EUR	12	12	10	10	Normal	Normal	Normal	Normal
ATXN7	GE_case294	Male	EUR	11	11	10	10	Normal	Normal	Normal	Normal
ATXN7	GE_case295	Male	AMR	13	14	11	12	Normal	Normal	Normal	Normal
ATXN7	GE_case296	Male	SAS	13	13	12	12	Normal	Normal	Normal	Normal
ATXN7	GE_case297	Male	SAS	12	15	10	13	Normal	Normal	Normal	Normal
ATXN7	GE_case298	Female	SAS	11	11	10	10	Normal	Normal	Normal	Normal
ATXN7	GE_case299	Male	SAS	12	12	10	10	Normal	Normal	Normal	Normal
ATXN7	GE_case300	Male	SAS	12	12	10	10	Normal	Normal	Normal	Normal
ATXN7	GE_case301	Female	AFR	12	12	10	10	Normal	Normal	Normal	Normal
ATXN7	GE_case302	Female	SAS	12	12	10	10	Normal	Normal	Normal	Normal
ATXN7	GE_case303	Female	SAS	11	11	10	10	Normal	Normal	Normal	Normal
ATXN7	GE_case304	Female	EUR	12	EXP	12	109	Normal	Full-mutation	Normal	Full-mutation
ATXN7	GE_case305	Male	EUR	30	41	30	40	Normal	Full-mutation	Normal	Full-mutation
ATXN7	GE_case306	Female	EUR	30	300	30	84	Normal	Full-mutation	Normal	Full-mutation
C9orf72	GE_case307	Male	SAS	2	4	2	4	Normal	Normal	Normal	Normal
C9orf72	GE_case308	Female	EUR	2	6	2	6	Normal	Normal	Normal	Normal
C9orf72	GE_case309	Female	EUR	5	8	5	8	Normal	Normal	Normal	Normal
C9orf72	GE_case310	Female	SAS	2	2	2	2	Normal	Normal	Normal	Normal
C9orf72	GE_case311	Female	EUR	2	8	2	8	Normal	Normal	Normal	Normal
C9orf72	GE_case312	Male	EUR	2	5	2	5	Normal	Normal	Normal	Normal
C9orf72	GE_case313	Male	EUR	2	8	2	8	Normal	Normal	Normal	Normal
C9orf72	GE_case314	Male	EUR	5	13	5	13	Normal	Normal	Normal	Normal
C9orf72	GE_case315	Female	EUR	2	15	2	15	Normal	Normal	Normal	Normal
C9orf72	GE_case316	Male	EUR	2	2	2	2	Normal	Normal	Normal	Normal
C9orf72	GE_case317	Male	AFR	2	6	2	6	Normal	Normal	Normal	Normal
C9orf72	GE_case318	Female	EUR	2	2	2	2	Normal	Normal	Normal	Normal
C9orf72	GE_case319	Female	EUR	2	2	2	2	Normal	Normal	Normal	Normal
C9orf72	GE_case320	Male	EUR	2	5	2	5	Normal	Normal	Normal	Normal
C9orf72	GE_case321	Male	AMR	2	8	2	8	Normal	Normal	Normal	Normal
C9orf72	GE_case322	Male	EUR	8	10	8	10	Normal	Normal	Normal	Normal
C9orf72	GE_case323	Female	EUR	2	8	2	8	Normal	Normal	Normal	Normal
C9orf72	GE_case324	Female	EUR	2	2	2	2	Normal	Normal	Normal	Normal
C9orf72	GE_case325	Female	EUR	2	6	2	11	Normal	Normal	Normal	Normal
C9orf72	GE_case326	Male	EUR	2	8	2	8	Normal	Normal	Normal	Normal
C9orf72	GE_case327	Male	EUR	2	2	2	2	Normal	Normal	Normal	Normal
C9orf72	GE_case328	Male	EUR	2	11	2	11	Normal	Normal	Normal	Normal
C9orf72	GE_case329	Male	EUR	2	6	2	6	Normal	Normal	Normal	Normal
C9orf72	GE_case330	Male	EUR	2	11	2	6	Normal	Normal	Normal	Normal
C9orf72	GE_case331	Male	EUR	2	2	2	2	Normal	Normal	Normal	Normal
C9orf72	GE_case332	Male	EUR	2	5	2	5	Normal	Normal	Normal	Normal
C9orf72	GE_case333	Male	EUR	2	2	2	2	Normal	Normal	Normal	Normal
C9orf72	GE_case334	Female	AFR	2	7	2	7	Normal	Normal	Normal	Normal
C9orf72	GE_case335	Male	EUR	2	2	2	2	Normal	Normal	Normal	Normal
C9orf72	GE_case336	Male	AMR	2	5	2	5	Normal	Normal	Normal	Normal
C9orf72	GE_case337	Female	EUR	2	22	2	20	Normal	Normal	Normal	Normal
C9orf72	GE_case338	Female	AFR	2	4	2	4	Normal	Normal	Normal	Normal
C9orf72	GE_case339	Male	EUR	7	8	7	8	Normal	Normal	Normal	Normal
C9orf72	GE_case340	Male	SAS	2	6	2	6	Normal	Normal	Normal	Normal
C9orf72	GE_case341	Male	EUR	6	7	6	7	Normal	Normal	Normal	Normal
C9orf72	GE_case342	Male	EUR	8	8	8	8	Normal	Normal	Normal	Normal
C9orf72	GE_case343	Male	EUR	2	5	2	5	Normal	Normal	Normal	Normal
C9orf72	GE_case344	Male	EUR	2	10	2	10	Normal	Normal	Normal	Normal
C9orf72	GE_case345	Female	EUR	2	2	2	2	Normal	Normal	Normal	Normal
C9orf72	GE_case346	Male	EUR	2	2	2	2	Normal	Normal	Normal	Normal
C9orf72	GE_case347	Female	EUR	2	8	2	8	Normal	Normal	Normal	Normal
C9orf72	GE_case348	Female	EUR	2	2	2	2	Normal	Normal	Normal	Normal
C9orf72	GE_case349	Male	EUR	2	2	2	2	Normal	Normal	Normal	Normal
C9orf72	GE_case350	Female	EUR	2	2	2	2	Normal	Normal	Normal	Normal
C9orf72	GE_case351	Male	EUR	2	5	2	5	Normal	Normal	Normal	Normal
C9orf72	GE_case352	Male	EUR	2	8	2	8	Normal	Normal	Normal	Normal
C9orf72	GE_case353	Male	EUR	2	2	2	8	Normal	Normal	Normal	Normal
C9orf72	GE_case354	Female	EUR	2	6	2	6	Normal	Normal	Normal	Normal
C9orf72	GE_case355	Female	EUR	2	EXP	2	117	Normal	Full-mutation	Normal	Full-mutation
C9orf72	GE_case356	Male	EUR	8	90	8	43	Normal	Full-mutation	Normal	Full-mutation
C9orf72	GE_case357	Male	EUR	2	EXP	2	58	Normal	Full-mutation	Normal	Full-mutation
C9orf72	GE_case358	Male	EUR	5	EXP	5	53	Normal	Full-mutation	Normal	Full-mutation
C9orf72	GE_case359	Male	EUR	2	90	2	46	Normal	Full-mutation	Normal	Full-mutation
C9orf72	GE_case360	Male	EUR	6	1500	6	52	Normal	Full-mutation	Normal	Full-mutation
C9orf72	GE_case361	Male	EUR	5	700	5	45	Normal	Full-mutation	Normal	Full-mutation
C9orf72	GE_case362	Female	EUR	9	50	10	36	Normal	Full-mutation	Normal	Full-mutation
C9orf72	GE_case363	Female	EUR	5	EXP	5	48	Normal	Full-mutation	Normal	Full-mutation
CACNA1A	GE_case364	Male	EUR	13	13	13	13	Normal	Normal	Normal	Normal
CACNA1A	GE_case365	Female	AMR	11	12	11	12	Normal	Normal	Normal	Normal
CACNA1A	GE_case366	Male	EUR	7	13	7	13	Normal	Normal	Normal	Normal
CACNA1A	GE_case367	Male	EUR	7	12	7	12	Normal	Normal	Normal	Normal
CACNA1A	GE_case368	Male	EUR	13	13	13	13	Normal	Normal	Normal	Normal
CACNA1A	GE_case369	Male	EUR	12	13	12	13	Normal	Normal	Normal	Normal
CACNA1A	GE_case370	Male	EUR	12	13	12	13	Normal	Normal	Normal	Normal
CACNA1A	GE_case371	Male	AFR	11	12	11	12	Normal	Normal	Normal	Normal
CACNA1A	GE_case372	Male	EUR	11	11	11	11	Normal	Normal	Normal	Normal
CACNA1A	GE_case373	Female	EUR	13	14	13	14	Normal	Normal	Normal	Normal
CACNA1A	GE_case374	Female	EUR	7	13	7	13	Normal	Normal	Normal	Normal
CACNA1A	GE_case375	Female	EUR	11	13	11	13	Normal	Normal	Normal	Normal
CACNA1A	GE_case376	Male	EUR	11	12	11	12	Normal	Normal	Normal	Normal
CACNA1A	GE_case377	Male	EUR	7	11	7	11	Normal	Normal	Normal	Normal
CACNA1A	GE_case378	Male	SAS	11	13	11	13	Normal	Normal	Normal	Normal
CACNA1A	GE_case379	Male	EUR	11	13	11	13	Normal	Normal	Normal	Normal
CACNA1A	GE_case380	Female	EUR	13	13	13	13	Normal	Normal	Normal	Normal
CACNA1A	GE_case381	Female	EUR	11	13	11	13	Normal	Normal	Normal	Normal
CACNA1A	GE_case382	Male	EUR	13	13	13	13	Normal	Normal	Normal	Normal
CACNA1A	GE_case383	Female	EUR	11	14	11	14	Normal	Normal	Normal	Normal
CACNA1A	GE_case384	Female	EUR	11	11	11	11	Normal	Normal	Normal	Normal
CACNA1A	GE_case385	Male	EUR	7	13	7	13	Normal	Normal	Normal	Normal
CACNA1A	GE_case386	Male	SAS	11	12	11	12	Normal	Normal	Normal	Normal
CACNA1A	GE_case387	Male	SAS	11	11	11	11	Normal	Normal	Normal	Normal
CACNA1A	GE_case388	Female	AFR	11	11	11	11	Normal	Normal	Normal	Normal
CACNA1A	GE_case389	Female	EUR	13	22	13	22	Normal	Full-mutation	Normal	Full-mutation
CACNA1A	GE_case390	Male	EUR	7	11	7	11	Normal	Normal	Normal	Normal
CACNA1A	GE_case391	Male	EUR	11	12	11	12	Normal	Normal	Normal	Normal
CACNA1A	GE_case392	Male	EUR	11	12	11	12	Normal	Normal	Normal	Normal
CACNA1A	GE_case393	Male	SAS	11	11	11	11	Normal	Normal	Normal	Normal
CACNA1A	GE_case394	Female	AFR	11	13	11	13	Normal	Normal	Normal	Normal
CACNA1A	GE_case395	Female	EUR	11	11	11	11	Normal	Normal	Normal	Normal
CACNA1A	GE_case396	Male	SAS	11	11	11	11	Normal	Normal	Normal	Normal
CACNA1A	GE_case397	Male	SAS	11	13	11	13	Normal	Normal	Normal	Normal
CACNA1A	GE_case398	Female	SAS	11	14	11	14	Normal	Normal	Normal	Normal
CACNA1A	GE_case399	Male	AMR	11	13	11	13	Normal	Normal	Normal	Normal
CACNA1A	GE_case400	Female	EUR	13	22	13	22	Normal	Full-mutation	Normal	Full-mutation
CACNA1A	GE_case401	Female	EUR	12	13	12	13	Normal	Normal	Normal	Normal
CACNA1A	GE_case402	Male	EUR	7	12	7	12	Normal	Normal	Normal	Normal
CACNA1A	GE_case403	Male	AMR	7	11	7	11	Normal	Normal	Normal	Normal
CACNA1A	GE_case404	Male	SAS	11	11	11	11	Normal	Normal	Normal	Normal
CACNA1A	GE_case405	Male	SAS	7	13	7	13	Normal	Normal	Normal	Normal
CACNA1A	GE_case406	Female	SAS	11	13	11	13	Normal	Normal	Normal	Normal
CACNA1A	GE_case407	Male	SAS	11	13	11	13	Normal	Normal	Normal	Normal
CACNA1A	GE_case408	Male	SAS	7	13	7	13	Normal	Normal	Normal	Normal
CACNA1A	GE_case409	Female	AFR	11	11	11	11	Normal	Normal	Normal	Normal
CACNA1A	GE_case410	Female	SAS	7	13	7	13	Normal	Normal	Normal	Normal
CACNA1A	GE_case411	Female	SAS	11	13	11	13	Normal	Normal	Normal	Normal
CACNA1A	GE_case412	Female	EUR	11	18	11	18	Normal	Normal	Normal	Normal
CACNA1A	GE_case413	Male	EUR	13	22	13	22	Normal	Full-mutation	Normal	Full-mutation
DMPK	GE_case414	Female	EUR	10	200	10	128	Normal	Full-mutation	Normal	Full-mutation
DMPK	GE_case415	Female	EUR	12	200	12	105	Normal	Full-mutation	Normal	Full-mutation
DMPK	GE_case416	Female	EUR	13	200	13	115	Normal	Full-mutation	Normal	Full-mutation
DMPK	GE_case417	Female	EUR	16	63	16	113	Normal	Full-mutation	Normal	Full-mutation
DMPK	GE_case418	Male	EUR	13	93	13	104	Normal	Full-mutation	Normal	Full-mutation
DMPK	GE_case419	Male	EUR	13	49	13	47	Normal	Premutation	Normal	Premutation
DMPK	GE_case420	Male	EUR	21	76	21	73	Normal	Full-mutation	Normal	Full-mutation
DMPK	GE_case421	Male	EUR	13	200	13	114	Normal	Full-mutation	Normal	Full-mutation
FMR1	GE_case422	Male	EUR	30	30	30	30	Normal	Normal	Normal	Normal
FMR1	GE_case423	Female	EUR	30	31	30	31	Normal	Normal	Normal	Normal
FMR1	GE_case424	Male	EUR	31	NA	30	NA	Normal	NA	Normal	NA
FMR1	GE_case425	Male	EUR	31	NA	31	NA	Normal	NA	Normal	NA
FMR1	GE_case426	Female	EUR	29	30	29	30	Normal	Normal	Normal	Normal
FMR1	GE_case427	Female	EUR	33	42	33	42	Normal	Normal	Normal	Normal
FMR1	GE_case428	Female	EUR	29	31	29	31	Normal	Normal	Normal	Normal
FMR1	GE_case429	Male	EUR	29	NA	29	NA	Normal	NA	Normal	NA
FMR1	GE_case430	Female	SAS	29	44	29	44	Normal	Normal	Normal	Normal
FMR1	GE_case431	Female	EUR	16	60	16	58	Normal	Premutation	Normal	Premutation
FMR1	GE_case432	Male	EUR	>200	NA	87	NA	Full-mutation	NA	Premutation	NA
FMR1	GE_case433	Male	EUR	200	NA	102	NA	Full-mutation	NA	Premutation	NA
FMR1	GE_case434	Female	EUR	30	59	30	57	Normal	Premutation	Normal	Premutation
FMR1	GE_case435	Male	EUR	51	NA	51	NA	Normal	NA	Normal	NA
FMR1	GE_case436	Male	EUR	45	NA	52	NA	Normal	NA	Normal	NA
FMR1	GE_case437	Male	EUR	45	NA	51	NA	Normal	NA	Normal	NA
FMR1	GE_case438	Male	EUR	48	NA	40	NA	Normal	NA	Normal	NA
FMR1	GE_case439	Male	EUR	48	NA	45	NA	Normal	NA	Normal	NA
FMR1	GE_case440	Female	EUR	45	45	48	48	Normal	Normal	Normal	Normal
FMR1	GE_case441	Male	EUR	200	NA	99	NA	Full-mutation	NA	Premutation	NA
FMR1	GE_case442	Male	EUR	59	NA	51	NA	Premutation	NA	Normal	NA
FMR1	GE_case443	Male	AFR	30	NA	50	NA	Normal	NA	Normal	NA
FMR1	GE_case444	Female	EUR	30	53	30	52	Normal	Normal	Normal	Normal
FMR1	GE_case445	Male	EUR	48	NA	47	NA	Normal	NA	Normal	NA
FMR1	GE_case446	Female	EUR	30	47	30	52	Normal	Normal	Normal	Normal
FMR1	GE_case447	Female	SAS	30	45	30	45	Normal	Normal	Normal	Normal
FMR1	GE_case448	Female	EUR	29	55	30	57	Normal	Normal	Normal	Normal
FMR1	GE_case449	Male	EUR	41	NA	54	NA	Normal	NA	Normal	NA
FMR1	GE_case450	Female	EUR	30	>200	30	114	Normal	Full-mutation	Normal	Premutation
FMR1	GE_case451	Male	EUR	51	NA	55	NA	Normal	NA	Normal	NA
FMR1	GE_case452	Male	EUR	44	NA	45	NA	Normal	NA	Normal	NA
FMR1	GE_case453	Male	EUR	>200	NA	80	NA	Full-mutation	NA	Premutation	NA
FMR1	GE_case454	Male	EUR	51	NA	45	NA	Normal	NA	Normal	NA
FMR1	GE_case455	Male	EUR	42	NA	41	NA	Normal	NA	Normal	NA
FMR1	GE_case456	Female	SAS	33	42	34	43	Normal	Normal	Normal	Normal
FMR1	GE_case457	Male	EUR	50	NA	55	NA	Normal	NA	Normal	NA
FMR1	GE_case458	Female	EUR	29	45	30	45	Normal	Normal	Normal	Normal
FMR1	GE_case459	Female	EUR	30	52	30	52	Normal	Normal	Normal	Normal
FMR1	GE_case460	Female	EUR	31	39	31	39	Normal	Normal	Normal	Normal
FMR1	GE_case461	Female	EUR	30	46	30	46	Normal	Normal	Normal	Normal
FMR1	GE_case462	Female	AFR	30	48	30	47	Normal	Normal	Normal	Normal
FMR1	GE_case463	Female	EUR	30	44	30	44	Normal	Normal	Normal	Normal
FMR1	GE_case464	Male	EUR	44	NA	44	NA	Normal	NA	Normal	NA
FMR1	GE_case465	Female	EUR	31	55	31	52	Normal	Normal	Normal	Normal
FMR1	GE_case466	Male	EUR	46	NA	48	NA	Normal	NA	Normal	NA
FMR1	GE_case467	Female	EUR	31	48	31	40	Normal	Normal	Normal	Normal
FMR1	GE_case468	Female	EUR	30	44	30	42	Normal	Normal	Normal	Normal
FMR1	GE_case469	Male	EUR	54	NA	51	NA	Normal	NA	Normal	NA
FMR1	GE_case470	Male	EUR	47	NA	42	NA	Normal	NA	Normal	NA
FMR1	GE_case471	Female	EUR	28	45	29	46	Normal	Normal	Normal	Normal
FMR1	GE_case472	Female	EUR	30	43	30	35	Normal	Normal	Normal	Normal
FMR1	GE_case473	Male	EUR	62	NA	57	NA	Premutation	NA	Premutation	NA
FMR1	GE_case474	Female	EUR	18	47	18	46	Normal	Normal	Normal	Normal
FMR1	GE_case475	Male	SAS	200	NA	75	NA	Full-mutation	NA	Premutation	NA
FMR1	GE_case476	Female	AFR	29	42	30	39	Normal	Normal	Normal	Normal
FMR1	GE_case477	Male	EUR	75	NA	70	NA	Premutation	NA	Premutation	NA
FMR1	GE_case478	Male	EUR	45	NA	49	NA	Normal	NA	Normal	NA
FMR1	GE_case479	Female	SAS	22	61	23	60	Normal	Premutation	Normal	Premutation
FMR1	GE_case480	Male	EUR	48	NA	43	NA	Normal	NA	Normal	NA
FMR1	GE_case481	Male	EUR	44	NA	42	NA	Normal	NA	Normal	NA
FMR1	GE_case482	Male	EUR	70	NA	64	NA	Premutation	NA	Premutation	NA
FMR1	GE_case483	Male	EUR	50	NA	34	NA	Normal	NA	Normal	NA
FMR1	GE_case484	Male	EUR	45	NA	46	NA	Normal	NA	Normal	NA
FMR1	GE_case485	Male	EUR	37	NA	37	NA	Normal	NA	Normal	NA
FMR1	GE_case486	Female	EUR	30	45	30	46	Normal	Normal	Normal	Normal
FMR1	GE_case487	Male	EUR	51	NA	51	NA	Normal	NA	Normal	NA
FMR1	GE_case488	Female	EUR	30	65	30	60	Normal	Premutation	Normal	Premutation
FMR1	GE_case489	Female	EUR	23	48	25	48	Normal	Normal	Normal	Normal
FMR1	GE_case490	Male	EUR	48	NA	41	NA	Normal	NA	Normal	NA
FMR1	GE_case491	Female	EUR	29	37	29	37	Normal	Normal	Normal	Normal
FMR1	GE_case492	Male	EUR	94	NA	67	NA	Premutation	NA	Premutation	NA
FMR1	GE_case493	Male	EUR	43	NA	43	NA	Normal	NA	Normal	NA
FMR1	GE_case494	Female	EUR	32	42	32	43	Normal	Normal	Normal	Normal
FMR1	GE_case495	Female	EUR	23	60	23	57	Normal	Premutation	Normal	Premutation
FMR1	GE_case496	Male	EUR	EXP	NA	131	NA	Full-mutation	NA	Full-mutation	NA
FMR1	GE_case497	Male	EUR	EXP	NA	115	NA	Full-mutation	NA	Full-mutation	NA
FMR1	GE_case498	Male	EUR	EXP	NA	74	NA	Full-mutation	NA	Premutation	NA
FMR1	GE_case499	Male	EUR	>200	NA	74	NA	Full-mutation	NA	Premutation	NA
FMR1	GE_case500	Female	EUR	30	86	31	71	Normal	Premutation	Normal	Premutation
FMR1	GE_case501	Female	EUR	30	EXP	29	85	Normal	Premutation	Normal	Premutation
FMR1	GE_case502	Female	EUR	31	EXP	31	55	Normal	Premutation	Normal	Premutation
FMR1	GE_case503	Female	EUR	23	92	23	64	Normal	Premutation	Normal	Premutation
FMR1	GE_case504	Male	EUR	200	NA	62	NA	Full-mutation	NA	Premutation	NA
FMR1	GE_case505	Female	EUR	31	200	31	75	Normal	Full-mutation	Normal	Premutation
FMR1	GE_case506	Male	EUR	200	NA	70	NA	Full-mutation	NA	Premutation	NA
FMR1	GE_case507	Female	EUR	29	200	29	67	Normal	Full-mutation	Normal	Premutation
FMR1	GE_case508	Male	EUR	82	NA	67	NA	Premutation	NA	Premutation	NA
FMR1	GE_case509	Male	EUR	>200	NA	69	NA	Full-mutation	NA	Premutation	NA
FXN	GE_case510	Male	EUR	9	21	9	21	Normal	Normal	Normal	Normal
FXN	GE_case511	Female	AMR	9	9	9	9	Normal	Normal	Normal	Normal
FXN	GE_case512	Male	EUR	9	9	9	9	Normal	Normal	Normal	Normal
FXN	GE_case513	Male	EUR	9	9	9	9	Normal	Normal	Normal	Normal
FXN	GE_case514	Male	EUR	9	9	9	9	Normal	Normal	Normal	Normal
FXN	GE_case515	Male	EUR	8	20	8	20	Normal	Normal	Normal	Normal
FXN	GE_case516	Male	EUR	9	10	9	10	Normal	Normal	Normal	Normal
FXN	GE_case517	Male	AFR	8	8	6	8	Normal	Normal	Normal	Normal
FXN	GE_case518	Male	EUR	8	22	8	22	Normal	Normal	Normal	Normal
FXN	GE_case519	Female	EUR	8	26	8	23	Normal	Normal	Normal	Normal
FXN	GE_case520	Female	EUR	9	24	9	23	Normal	Normal	Normal	Normal
FXN	GE_case521	Female	EUR	8	25	8	25	Normal	Normal	Normal	Normal
FXN	GE_case522	Male	EUR	8	18	8	18	Normal	Normal	Normal	Normal
FXN	GE_case523	Male	EUR	9	19	9	19	Normal	Normal	Normal	Normal
FXN	GE_case524	Male	SAS	8	9	8	9	Normal	Normal	Normal	Normal
FXN	GE_case525	Male	EUR	9	25	10	25	Normal	Normal	Normal	Normal
FXN	GE_case526	Female	EUR	9	30	9	30	Normal	Normal	Normal	Normal
FXN	GE_case527	Female	EUR	9	9	9	9	Normal	Normal	Normal	Normal
FXN	GE_case528	Male	EUR	8	8	8	8	Normal	Normal	Normal	Normal
FXN	GE_case529	Female	EUR	9	9	9	9	Normal	Normal	Normal	Normal
FXN	GE_case530	Female	EUR	8	8	8	8	Normal	Normal	Normal	Normal
FXN	GE_case531	Male	EUR	9	9	9	9	Normal	Normal	Normal	Normal
FXN	GE_case532	Male	SAS	9	9	9	9	Normal	Normal	Normal	Normal
FXN	GE_case533	Male	EUR	EXP	EXP	75	106	Full-mutation	Full-mutation	Full-mutation	Full-mutation
FXN	GE_case534	Female	EUR	35	150	36	120	Normal	Full-mutation	Normal	Full-mutation
FXN	GE_case535	Male	EUR	600	600	77	107	Full-mutation	Full-mutation	Full-mutation	Full-mutation
FXN	GE_case536	Female	EUR	31	118	33	143	Normal	Full-mutation	Normal	Full-mutation
FXN	GE_case537	Female	EUR	9	1500	9	95	Normal	Full-mutation	Normal	Full-mutation
FXN	GE_case538	Female	EUR	1500	1500	85	125	Full-mutation	Full-mutation	Full-mutation	Full-mutation
FXN	GE_case539	Female	EUR	1000	1000	87	132	Full-mutation	Full-mutation	Full-mutation	Full-mutation
FXN	GE_case540	Female	EUR	9	350	9	86	Normal	Full-mutation	Normal	Full-mutation
FXN	GE_case541	Female	EUR	9	300	9	96	Normal	Full-mutation	Normal	Full-mutation
FXN	GE_case542	Female	EUR	150	1000	90	140	Full-mutation	Full-mutation	Full-mutation	Full-mutation
FXN	GE_case543	Female	EUR	EXP	EXP	97	156	Full-mutation	Full-mutation	Full-mutation	Full-mutation
FXN	GE_case544	Male	EUR	15	86	16	86	Normal	Full-mutation	Normal	Full-mutation
HTT	GE_case545	Male	EUR	18	24	18	24	Normal	Normal	Normal	Normal
HTT	GE_case546	Female	AMR	17	21	17	21	Normal	Normal	Normal	Normal
HTT	GE_case547	Male	EUR	18	27	18	24	Normal	Normal	Normal	Normal
HTT	GE_case548	Male	EUR	18	25	18	25	Normal	Normal	Normal	Normal
HTT	GE_case549	Male	EUR	17	17	17	17	Normal	Normal	Normal	Normal
HTT	GE_case550	Male	EUR	12	17	12	17	Normal	Normal	Normal	Normal
HTT	GE_case551	Male	EUR	15	20	15	20	Normal	Normal	Normal	Normal
HTT	GE_case552	Male	AFR	18	19	18	19	Normal	Normal	Normal	Normal
HTT	GE_case553	Male	EUR	17	17	17	17	Normal	Normal	Normal	Normal
HTT	GE_case554	Female	EUR	17	23	17	23	Normal	Normal	Normal	Normal
HTT	GE_case555	Female	EUR	15	17	15	17	Normal	Normal	Normal	Normal
HTT	GE_case556	Female	EUR	18	20	18	20	Normal	Normal	Normal	Normal
HTT	GE_case557	Male	EUR	15	24	15	24	Normal	Normal	Normal	Normal
HTT	GE_case558	Male	EUR	17	23	17	23	Normal	Normal	Normal	Normal
HTT	GE_case559	Male	SAS	17	23	17	23	Normal	Normal	Normal	Normal
HTT	GE_case560	Male	EUR	15	21	15	21	Normal	Normal	Normal	Normal
HTT	GE_case561	Female	EUR	17	24	17	24	Normal	Normal	Normal	Normal
HTT	GE_case562	Female	EUR	20	21	20	21	Normal	Normal	Normal	Normal
HTT	GE_case563	Male	EUR	17	17	17	17	Normal	Normal	Normal	Normal
HTT	GE_case564	Female	EUR	17	17	17	17	Normal	Normal	Normal	Normal
HTT	GE_case565	Female	EUR	19	21	19	21	Normal	Normal	Normal	Normal
HTT	GE_case566	Male	EUR	20	26	20	26	Normal	Normal	Normal	Normal
HTT	GE_case567	Male	SAS	17	17	17	17	Normal	Normal	Normal	Normal
HTT	GE_case568	Male	EUR	20	28	20	28	Normal	Normal	Normal	Normal
HTT	GE_case569	Female	EUR	15	27	15	27	Normal	Normal	Normal	Normal
HTT	GE_case570	Male	EUR	18	26	18	26	Normal	Normal	Normal	Normal
HTT	GE_case571	Male	EUR	14	26	14	26	Normal	Normal	Normal	Normal
HTT	GE_case572	Male	EUR	17	29	17	29	Normal	Normal	Normal	Normal
HTT	GE_case573	Female	EUR	18	27	17	27	Normal	Normal	Normal	Normal
HTT	GE_case574	Female	EUR	19	31	19	31	Normal	Normal	Normal	Normal
HTT	GE_case575	Female	EUR	15	36	15	36	Normal	Premutation	Normal	Premutation
HTT	GE_case576	Female	EUR	17	26	17	26	Normal	Normal	Normal	Normal
HTT	GE_case577	Female	EUR	19	30	19	30	Normal	Normal	Normal	Normal
HTT	GE_case578	Male	EUR	15	36	15	36	Normal	Premutation	Normal	Premutation
HTT	GE_case579	Male	EUR	18	18	18	18	Normal	Normal	Normal	Normal
HTT	GE_case580	Male	EUR	17	30	17	30	Normal	Normal	Normal	Normal
HTT	GE_case581	Male	EUR	23	28	23	28	Normal	Normal	Normal	Normal
HTT	GE_case582	Female	EUR	20	30	20	30	Normal	Normal	Normal	Normal
HTT	GE_case583	Male	EUR	18	27	18	27	Normal	Normal	Normal	Normal
HTT	GE_case584	Male	AMR	17	26	17	26	Normal	Normal	Normal	Normal
HTT	GE_case585	Female	EUR	17	34	17	34	Normal	Normal	Normal	Normal
HTT	GE_case586	Female	EUR	21	44	21	44	Normal	Full-mutation	Normal	Full-mutation
HTT	GE_case587	Male	EUR	19	30	19	30	Normal	Normal	Normal	Normal
HTT	GE_case588	Male	EUR	17	26	17	26	Normal	Normal	Normal	Normal
HTT	GE_case589	Male	EUR	17	29	17	29	Normal	Normal	Normal	Normal
HTT	GE_case590	Female	EUR	18	42	17	41	Normal	Full-mutation	Normal	Full-mutation
HTT	GE_case591	Male	EUR	17	27	17	27	Normal	Normal	Normal	Normal
HTT	GE_case592	Male	EUR	19	31	19	31	Normal	Normal	Normal	Normal
HTT	GE_case593	Female	EUR	21	26	21	26	Normal	Normal	Normal	Normal
HTT	GE_case594	Female	EUR	18	36	18	36	Normal	Premutation	Normal	Premutation
HTT	GE_case595	Female	AFR	15	28	15	28	Normal	Normal	Normal	Normal
HTT	GE_case596	Male	EUR	19	29	19	29	Normal	Normal	Normal	Normal
HTT	GE_case597	Female	EUR	15	30	15	30	Normal	Normal	Normal	Normal
HTT	GE_case598	Female	EUR	19	33	19	33	Normal	Normal	Normal	Normal
HTT	GE_case599	Female	EUR	17	27	17	27	Normal	Normal	Normal	Normal
HTT	GE_case600	Female	EUR	17	27	17	27	Normal	Normal	Normal	Normal
HTT	GE_case601	Male	EUR	17	28	17	28	Normal	Normal	Normal	Normal
HTT	GE_case602	Female	EUR	17	27	17	27	Normal	Normal	Normal	Normal
HTT	GE_case603	Female	EUR	16	29	16	29	Normal	Normal	Normal	Normal
HTT	GE_case604	Male	EUR	16	31	16	31	Normal	Normal	Normal	Normal
HTT	GE_case605	Male	EUR	19	26	19	26	Normal	Normal	Normal	Normal
HTT	GE_case606	Female	EUR	18	29	18	29	Normal	Normal	Normal	Normal
HTT	GE_case607	Female	EUR	17	30	17	30	Normal	Normal	Normal	Normal
HTT	GE_case608	Female	EUR	26	30	26	30	Normal	Normal	Normal	Normal
HTT	GE_case609	Male	EUR	17	26	17	26	Normal	Normal	Normal	Normal
HTT	GE_case610	Female	EUR	17	42	19	43	Normal	Full-mutation	Normal	Full-mutation
HTT	GE_case611	Female	EUR	17	42	17	43	Normal	Full-mutation	Normal	Full-mutation
HTT	GE_case612	Female	SAS	18	18	17	17	Normal	Normal	Normal	Normal
HTT	GE_case613	Male	EUR	19	39	19	39	Normal	Premutation	Normal	Premutation
HTT	GE_case614	Female	EUR	19	39	19	39	Normal	Premutation	Normal	Premutation
HTT	GE_case615	Female	EUR	17	39	17	39	Normal	Premutation	Normal	Premutation
HTT	GE_case616	Male	EUR	18	38	18	38	Normal	Premutation	Normal	Premutation
HTT	GE_case617	Male	EUR	19	37	19	37	Normal	Premutation	Normal	Premutation
HTT	GE_case618	Male	EUR	16	37	16	37	Normal	Premutation	Normal	Premutation
HTT	GE_case619	Male	EUR	17	97	17	95	Normal	Full-mutation	Normal	Full-mutation
HTT	GE_case620	Male	EUR	17	60	17	68	Normal	Full-mutation	Normal	Full-mutation
HTT	GE_case621	Male	EUR	19	57	19	67	Normal	Full-mutation	Normal	Full-mutation
HTT	GE_case622	Female	EUR	18	52	18	59	Normal	Full-mutation	Normal	Full-mutation
HTT	GE_case623	Female	EUR	30	49	30	52	Normal	Full-mutation	Normal	Full-mutation
HTT	GE_case624	Male	EUR	17	44	17	43	Normal	Full-mutation	Normal	Full-mutation
HTT	GE_case625	Female	EUR	20	43	20	45	Normal	Full-mutation	Normal	Full-mutation
HTT	GE_case626	Male	EUR	18	40	18	42	Normal	Full-mutation	Normal	Full-mutation
HTT	GE_case627	Female	EUR	21	63	21	107	Normal	Full-mutation	Normal	Full-mutation
NOTCH2NLC	GE_case628	Female	EUR	18	20	18	20	Normal	Normal	Normal	Normal
NOTCH2NLC	GE_case629	Female	AMR	16	18	18	19	Normal	Normal	Normal	Normal
NOTCH2NLC	GE_case630	Female	EUR	16	24	16	24	Normal	Normal	Normal	Normal
NOTCH2NLC	GE_case631	Female	EUR	16	21	16	21	Normal	Normal	Normal	Normal
NOTCH2NLC	GE_case632	Female	EUR	2	19	19	19	Normal	Normal	Normal	Normal
NOTCH2NLC	GE_case633	Male	EUR	1	13	13	13	Normal	Normal	Normal	Normal
NOTCH2NL	GE_case634	Female	EUR	26	118	18	58	Normal	Full-mutation	Normal	Full-mutation
PPP2R2B	GE_case635	Female	EUR	30	53	30	61	Normal	Premutation	Normal	Premutation
PPP2R2B	GE_case636	Female	EUR	15	59	15	59	Normal	Premutation	Normal	Premutation
PPP2R2B	GE_case637	Male	EAS	11	47	13	49	Normal	Premutation	Normal	Premutation
TBP	GE_case638	Male	EUR	30	37	36	36	Normal	Normal	Normal	Normal
TBP	GE_case639	Female	AMR	37	37	37	37	Normal	Normal	Normal	Normal
TBP	GE_case640	Male	EUR	37	38	36	36	Normal	Normal	Normal	Normal
TBP	GE_case641	Male	EUR	38	39	36	36	Normal	Normal	Normal	Normal
TBP	GE_case642	Male	EUR	38	38	36	36	Normal	Normal	Normal	Normal
TBP	GE_case643	Male	EUR	38	38	30	30	Normal	Normal	Normal	Normal
TBP	GE_case644	Male	EUR	37	38	37	37	Normal	Normal	Normal	Normal
TBP	GE_case645	Male	AFR	35	38	38	38	Normal	Normal	Normal	Normal
TBP	GE_case646	Male	EUR	36	37	36	36	Normal	Normal	Normal	Normal
TBP	GE_case647	Female	EUR	36	39	39	39	Normal	Normal	Normal	Normal
TBP	GE_case648	Female	EUR	38	38	34	34	Normal	Normal	Normal	Normal
TBP	GE_case649	Female	EUR	36	38	37	37	Normal	Normal	Normal	Normal
TBP	GE_case650	Male	EUR	36	37	35	35	Normal	Normal	Normal	Normal
TBP	GE_case651	Male	EUR	37	39	37	37	Normal	Normal	Normal	Normal
TBP	GE_case652	Male	SAS	28	38	27	37	Normal	Normal	Normal	Normal
TBP	GE_case653	Male	EUR	37	38	35	35	Normal	Normal	Normal	Normal
TBP	GE_case654	Female	EUR	30	36	29	36	Normal	Normal	Normal	Normal
TBP	GE_case655	Female	EUR	37	38	37	38	Normal	Normal	Normal	Normal
TBP	GE_case656	Male	EUR	37	37	37	37	Normal	Normal	Normal	Normal
TBP	GE_case657	Female	EUR	36	38	35	38	Normal	Normal	Normal	Normal
TBP	GE_case658	Female	EUR	36	37	35	37	Normal	Normal	Normal	Normal
TBP	GE_case659	Male	EUR	36	38	35	35	Normal	Normal	Normal	Normal
TBP	GE_case660	Male	SAS	38	39	38	39	Normal	Normal	Normal	Normal
TBP	GE_case661	Female	SAS	37	42	35	41	Normal	Premutation	Normal	Premutation
TBP	GE_case662	Female	SAS	36	47	35	45	Normal	Premutation	Normal	Premutation
TBP	GE_case663	Male	EUR	37	38	37	38	Normal	Normal	Normal	Normal
TBP	GE_case664	Male	EUR	37	41	37	41	Normal	Premutation	Normal	Premutation
TBP	GE_case665	Male	SAS	37	37	36	36	Normal	Normal	Normal	Normal
TBP	GE_case666	Female	SAS	38	41	38	41	Normal	Premutation	Normal	Premutation
TBP	GE_case667	Female	SAS	38	41	37	40	Normal	Premutation	Normal	Normal
TBP	GE_case668	Female	SAS	36	42	36	42	Normal	Premutation	Normal	Premutation
TBP	GE_case669	Male	SAS	38	42	37	41	Normal	Premutation	Normal	Premutation
TBP	GE_case670	Female	EUR	38	44	38	43	Normal	Premutation	Normal	Premutation
TBP	GE_case671	Male	EUR	37	39	35	38	Normal	Normal	Normal	Normal
TBP	GE_case672	Female	EUR	38	42	37	42	Normal	Premutation	Normal	Premutation
TBP	GE_case673	Female	SAS	37	42	35	41	Normal	Premutation	Normal	Premutation
TBP	GE_case674	Female	EUR	37	38	36	37	Normal	Normal	Normal	Normal
TBP	GE_case675	Female	EUR	37	39	35	38	Normal	Normal	Normal	Normal
TBP	GE_case676	Male	EUR	34	42	34	40	Normal	Premutation	Normal	Premutation
TBP	GE_case677	Male	EUR	33	42	33	40	Normal	Premutation	Normal	Premutation
TBP	GE_case678	Male	AFR	34	42	34	42	Normal	Premutation	Normal	Premutation
TBP	GE_case679	Female	EUR	36	42	36	41	Normal	Premutation	Normal	Premutation
TBP	GE_case680	Female	EUR	37	50	37	49	Normal	Full-mutation	Normal	Full-mutation
TBP	GE_case681	Female	EUR	38	52	37	52	Normal	Full-mutation	Normal	Full-mutation

## Sheet: TableS4
Table S4. Total number of alleles from Table S3 with an expansion beyond premutation/reduced penetrance and full-mutation after visual inspection. Measured by PCR and ExpansionHunter v3.2.2.
Note that mismatches calls between PCR and EH calls are marked in red.
Gene	PCR		WGS
			Normal	Premutation/reduced penetrance	Full-mutation	Total
AR		Normal	35	0	0	35
		Premutation	0	1	0	1
		Full-mutation	0	0	11	11
		Total	35	1	11	47
ATN1		Normal	60	0	0	60
		Premutation	0	0	0	0
		Full-mutation	0	0	8	8
		Total	60	0	8	68
ATXN1		Normal	151	0	0	151
		Premutation	0	0	0	0
		Full-mutation	0	0	1	1
		Total	151	0	1	152
ATXN2		Normal	116	0	0	116
		Premutation	0	1	0	1
		Full-mutation	0	0	5	5
		Total	116	1	5	122
ATXN3		Normal	92	0	0	92
		Premutation	0	0	0	0
		Full-mutation	0	1	3	4
		Total	92	1	3	96
ATXN7		Normal	96	0	0	96
		Premutation	0	0	0	0
		Full-mutation	0	0	4	4
		Total	96	0	4	100
C9orf72		Normal	105	0	0	105
		Premutation	0	0	0	0
		Full-mutation	0	0	9	9
		Total	105	0	9	114
CACNA1A		Normal	97	0	0	97
		Premutation	0	0	0	0
		Full-mutation	0	0	3	3
		Total	97	0	3	100
DMPK		Normal	8	0	0	8
		Premutation	0	1	0	1
		Full-mutation	0	0	7	7
		Total	8	1	7	16
FMR1		Normal	99	0	0	98
		Premutation	1	14	0	15
		Full-mutation	0	13	2	15
		Total	100	27	2	129
FXN		Normal	52	0	0	52
		Premutation	0	0	0	0
		Full-mutation	0	0	18	18
		Total	52	0	18	70
HTT		Normal	144	0	0	144
		Premutation	0	9	0	9
		Full-mutation	0	0	13	13
		Total	144	9	13	166
NOTCH2NLC		Normal	13	0	0	13
		Premutation	0	0	0	0
		Full-mutation	0	0	1	1
		Total	13	0	1	14
PPP2R2B		Normal	3	0	0	3
		Premutation	0	3	0	3
		Full-mutation	0	0	0	0
		Total	3	3	0	6
TBP		Normal	72	0	0	72
		Premutation	1	13	0	14
		Full-mutation	0	0	2	2
		Total	73	13	2	88
			WGS
			Normal	Premutation	Full-mutation	Total
Overall with FMR1	PCR	Normal	1143	0	0	1142
		Premutation	2	42	0	44
		Full-mutation	0	14	87	101
Overall without FMR1		Normal	1044	0	0	1044
		Premutation	1	28	0	29
		Full-mutation	0	1	85	86

## Sheet: TableS5
Table S5. Count of genomes carrying alleles in the premutation/reduced penetrance and full mutation range, before and after quality control, in the 100K GP and TOPMed cohorts. Count by gene and overall.
Cohort	Locus	No. BEFORE quality control		No. AFTER quality control
		Premutation/ Reduced Penetrance	Full-mutation	Premutation/ Reduced Penetrance	Full-mutation
100K GP	AR males	19	3	16	3
TOPMed		13	10	10	10
100K GP	ATN1	5	0	4	0
TOPMed		23	3	21	1
100K GP	ATXN1	125	24	120	5
TOPMed		185	55	75	8
100K GP	ATXN2	20	8	14	3
TOPMed		30	45	23	13
100K GP	ATXN3	1	0	0	0
TOPMed		15	0	9	0
100K GP	ATXN7	2	1	0	1
TOPMed		3	1	3	1
100K GP	C9orf72	-	43	-	40
TOPMed		-	59	-	58
100K GP	CACNA1A	2	12	2	8
TOPMed		5	12	4	8
100K GP	DMPK	142	23	141	22
TOPMed		184	27	180	24
100K GP	FXN	111	455	29	449
TOPMed		135	396	76	368
100K GP	HTT	60	16	58	13
TOPMed		73	14	59	7
100K GP	NOTCH2NLC	520	190	3	0
TOPMed		2066	132	0	28
100K GP	JPH3	6	0	5	0
TOPMed		65	6	62	1
100K GP	PPP2R2B	9	0	8	0
TOPMed		12	0	11	0
100K GP	TBP	493	70	133	0
TOPMed		1155	223	192	2

## Sheet: TableS6
TableS6. Frequency of DMPK expansions in patients from both TOPMed and 100K GP with and without cardiovascular disease.
Cohort	nSamples	nPremutations	nFullmutations	% full mutation	Study name
TOPMed-Amish	245	1	2	0.816327	NHLBI TOPMed: Genetics of Cardiometabolic Health in the Amish
TOPMed-MGH	896	6	3	0.334821	NHLBI TOPMed - NHGRI CCDG: MGH Atrial Fibrillation Study
TOPMed-VTE	1316	11	0	0	NHLBI TOPMed: Whole Genome Sequencing of Venous Thromboembolism (WGS of VTE)
TOPMed-ARIC	3586	23	3	0.0836587	NHLBI TOPMed - NHGRI CCDG: Atherosclerosis Risk in Communities (ARIC)
TOPMed-WHI	10864	49	2	0.0184094	NHLBI TOPMed: Women's Health Initiative (WHI)
TOPMed-VU_AF	1103	4	1	0.0906618	NHLBI TOPMed: The Vanderbilt Atrial Fibrillation Registry (VU_AF)
TOPMed-FHS	1606	6	1	0.0622665	NHLBI TOPMed: Whole Genome Sequencing and Related Phenotypes in the Framingham Heart Study
TOPMed-CHS	3243	14	0	0	NHLBI TOPMed: Cardiovascular Health Study
TOPMed-BioMe	9159	21	9	0.098264	NHLBI TOPMed - NHGRI CCDG: The BioMe Biobank at Mount Sinai
TOPMed-COPD	9616	30	1	0.0103993	NHLBI TOPMed: Genetic Epidemiology of COPD (COPDGene)
TOPMed-MESA	4414	7	3	0.0679656	NHLBI TOPMed: MESA and MESA Family AA-CAC
TOPMed-JSH	1923	1	0	0	NHLBI TOPMed: The Jackson Heart Study (JHS)
TOPMed-HyperGen	860	0	0	0	NHLBI TOPMed: HyperGEN - Genetics of Left Ventricular (LV) Hypertrophy
100KGP-CARDIO	2586	8	2	0.000773395	100K GP
100KGP-NOTCARDIO	31603	123	18	0.000569566	100K GP

## Sheet: TableS7
Table S7. Count of premutation/reduced penetrance and full mutation allele carriers (after visual inspection) for X-linked and autosomal dominant loci, in the 100K GP and TOPMed cohorts split by ancestry.
Locus	Ancestry	Cohort	Total unrel neuro excl	Premutation/reduced penetrance	Full-mutation	1 in …. (95% CI) premutation/reduced penetrance	1 in …. (95% CI) full-mutation
AR	AFR	100K GP	1211	0	0	-	-
		TOPMed	11575	6	2	1 in 1929 (885-4209)	1 in 5788 (1588-21104)
	AMR	100K GP	636	1	0	1 in 636 (113-3602)	-
		TOPMed	5037	2	5	1 in 2518 (691-9183)	1 in 1007 (431-2358)
	EAS	100K GP	294	1	0	1 in 294 (53-1665)	-
		TOPMed	972	3	2	1 in 324 (111-952)	1 in 486 (134-1772)
	EUR	100K GP	29496	64	14	1 in 461 (361-588)	1 in 2107 (1255-3537)
		TOPMed	30071	61	23	1 in 493 (384-633)	1 in 1307 (871-1962)
	SAS	100K GP	2552	5	1	1 in 510 (218-1195)	1 in 2552 (451-14457)
		TOPMed	330	1	0	1 in 330 (59-1869)	-
	TOTAL	100K GP	34189	71	15	1 in 482 (382-607)	1 in 2279 (1382-3761)
		TOPMed	47985	73	32	1 in 657 (523-826)	1 in 1500 (1062-2117)
		Combined	82174	144	47	1 in 571 (485-672)	1 in 1748 (1315-2325)
AR males	AFR	100K GP	567	0	0	-	-
		TOPMed	4379	0	0	-	-
	AMR	100K GP	320	0	0	-	-
		TOPMed	1861	1	2	1 in 1861 (329-10542)	1 in 930 (256-3393)
	EAS	100K GP	108	0	0	-	-
		TOPMed	366	1	1	1 in 366 (65-2073)	1 in 366 (65-2073)
	EUR	100K GP	13237	15	3	1 in 882 (535-1456)	1 in 4412 (1501-12974)
		TOPMed	11017	8	7	1 in 1377 (698-2717)	1 in 1574 (763-3249)
	SAS	100K GP	1234	1	0	1 in 1234 (219-6990)	-
		TOPMed	201	0	0	-	-
	TOTAL	100K GP	15466	16	3	1 in 967 (595-1570)	1 in 5155 (1754-15159)
		TOPMed	17824	10	10	1 in 1782 (968-3281)	1 in 1782 (968-3281)
		Combined	33290	26	13	1 in 1280 (874-1876)	1 in 2561 (1497-4381)
ATN1	AFR	100K GP	1211	0	0	-	-
		TOPMed	11575	8	1	1 in 1447 (733-2855)	1 in 11575 (2044-65573)
	AMR	100K GP	636	0	0	-	-
		TOPMed	5037	0	0	-	-
	EAS	100K GP	294	1	0	1 in 294 (53-1665)	-
		TOPMed	972	3	0	1 in 324 (111-952)	-
	EUR	100K GP	29496	2	0	1 in 14748 (4045-53779)	-
		TOPMed	30066	10	0	1 in 3007 (1633-5535)	-
	SAS	100K GP	2552	1	0	1 in 2552 (451-14457)	-
		TOPMed	330	0	0	-	-
	TOTAL	100K GP	34189	4	0	1 in 8547 (3324-21979)	-
		TOPMed	47980	21	1	1 in 2285 (1495-3493)	1 in 47980 (8470-271810)
		Combined	82169	25	1	1 in 3287 (2227-4852)	1 in 82169 (14505-465493)
ATXN1	AFR	100K GP	1211	1	0	1 in 1211 (214-6860)	-
		TOPMed	11575	13	0	1 in 890 (521-1523)	-
	AMR	100K GP	636	0	2	-	1 in 318 (88-1159)
		TOPMed	5037	1	0	1 in 5037 (890-28534)	-
	EAS	100K GP	294	1	0	1 in 294 (53-1665)	-
		TOPMed	972	2	0	1 in 486 (134-1772)	-
	EUR	100K GP	29496	100	3	1 in 295 (243-359)	1 in 9832 (3344-28910)
		TOPMed	30071	59	8	1 in 510 (395-657)	1 in 3759 (1905-7418)
	SAS	100K GP	2552	18	0	1 in 142 (90-224)	-
		TOPMed	330	0	0	-	-
	TOTAL	100K GP	34189	120	5	1 in 285 (238-341)	1 in 6838 (2921-16008)
		TOPMed	47985	75	8	1 in 640 (511-802)	1 in 5998 (3040-11837)
		Combined	82174	195	13	1 in 421 (366-485)	1 in 6321 (3694-10816)
ATXN2	AFR	100K GP	1211	1	0	1 in 1211 (214-6860)	-
		TOPMed	11574	7	3	1 in 1653 (801-3413)	1 in 3858 (1313-11344)
	AMR	100K GP	636	1	0	1 in 636 (113-3602)	-
		TOPMed	5037	3	2	1 in 1679 (571-4937)	1 in 2518 (691-9183)
	EAS	100K GP	294	1	0	1 in 294 (53-1665)	-
		TOPMed	972	1	0	1 in 972 (172-5506)	-
	EUR	100K GP	29496	11	2	1 in 2681 (1498-4802)	1 in 14748 (4045-53779)
		TOPMed	30068	11	8	1 in 2733 (1527-4895)	1 in 3758 (1905-7417)
	SAS	100K GP	2552	0	1	-	1 in 2552 (451-14457)
		TOPMed	330	1	0	1 in 330 (59-1869)	-
	TOTAL	100K GP	34189	14	3	1 in 2442 (1455-4099)	1 in 11396 (3876-33510)
		TOPMed	47981	23	13	1 in 2086 (1390-3130)	1 in 3691 (2157-6315)
		Combined	82170	37	16	1 in 2221 (1611-3061)	1 in 5136 (3162-8343)
ATXN3	AFR	100K GP	1211	0	0	-	-
		TOPMed	11575	7	0	1 in 1654 (801-3413)	-
	AMR	100K GP	636	0	0	-	-
		TOPMed	5037	0	0	-	-
	EAS	100K GP	294	0	0	-	-
		TOPMed	972	2	0	1 in 486 (134-1772)	-
	EUR	100K GP	29496	0	0	-	-
		TOPMed	30071	0	0	-	-
	SAS	100K GP	2552	0	0	-	-
		TOPMed	330	0	0	-	-
	TOTAL	100K GP	34189	0	0	-	-
		TOPMed	47985	9	0	1 in 5332 (2805-10134)	-
		Combined	82174	9	0	1 in 9130 (4804-17354)	-
ATXN7	AFR	100K GP	1211	0	1	-	1 in 1211 (214-6860)
		TOPMed	11569	3	1	1 in 3856 (1312-11339)	1 in 11569 (2043-65539)
	AMR	100K GP	636	0	0	-	-
		TOPMed	5037	0	0	-	-
	EAS	100K GP	294	0	0	-	-
		TOPMed	972	0	0	-	-
	EUR	100K GP	29489	0	0	-	-
		TOPMed	30065	0	0	-	-
	SAS	100K GP	2551	0	0	-	-
		TOPMed	330	0	0	-	-
	TOTAL	100K GP	34181	0	1	-	1 in 34181 (6034-193637)
		TOPMed	47973	3	1	1 in 15991 (5439-47020)	1 in 47973 (8469-271770)
		Combined	82154	3	2	1 in 27385 (9314-80523)	1 in 41077 (11265-149790)
C9orf72	AFR	100K GP	1211	NA	0	-	-
		TOPMed	11575	NA	6	-	1 in 1929 (885-4209)
	AMR	100K GP	636	NA	0	-	-
		TOPMed	5038	NA	1	-	1 in 5038 (890-28540)
	EAS	100K GP	294	NA	0	-	-
		TOPMed	972	NA	0	-	-
	EUR	100K GP	29496	NA	39	-	1 in 756 (553-1034)
		TOPMed	30071	NA	51	-	1 in 590 (449-775)
	SAS	100K GP	2552	NA	1	-	1 in 2552 (451-14457)
		TOPMed	330	NA	0	-	-
	TOTAL	100K GP	34189	NA	40	-	1 in 855 (628-1164)
		TOPMed	47986	NA	58	-	1 in 827 (640-1069)
		Combined	82175	NA	98	-	1 in 839 (688-1022)
CACNA1A	AFR	100K GP	1211	0	0	-	-
		TOPMed	11575	0	0	-	-
	AMR	100K GP	636	0	0	-	-
		TOPMed	5037	0	0	-	-
	EAS	100K GP	294	0	0	-	-
		TOPMed	972	1	1	1 in 972 (172-5506)	1 in 972 (172-5506)
	EUR	100K GP	29496	2	8	1 in 14748 (4045-53779)	1 in 3687 (1869-7276)
		TOPMed	30067	3	7	1 in 10022 (3409-29470)	1 in 4295 (2081-8867)
	SAS	100K GP	2552	0	0	-	-
		TOPMed	330	0	0	-	-
	TOTAL	100K GP	34189	2	8	1 in 17094 (4688-62336)	1 in 4274 (2166-8434)
		TOPMed	47981	4	8	1 in 11995 (4665-30846)	1 in 5998 (3039-11836)
		Combined	82170	6	16	1 in 13695 (6277-29882)	1 in 5136 (3162-8343)
DMPK	AFR	100K GP	1211	0	0	-	-
		TOPMed	11575	12	0	1 in 965 (552-1686)	-
	AMR	100K GP	636	0	1	-	1 in 636 (113-3602)
		TOPMed	5037	13	5	1 in 387 (227-663)	1 in 1007 (431-2358)
	EAS	100K GP	294	0	0	-	-
		TOPMed	972	0	0	-	-
	EUR	100K GP	29496	140	20	1 in 211 (179-249)	1 in 1475 (955-2278)
		TOPMed	30070	155	19	1 in 194 (166-227)	1 in 1583 (1013-2472)
	SAS	100K GP	2552	1	1	1 in 2552 (451-14457)	1 in 2552 (451-14457)
		TOPMed	330	0	0	-	-
	TOTAL	100K GP	34189	141	22	1 in 242 (206-286)	1 in 1554 (1027-2353)
		TOPMed	47984	180	24	1 in 267 (230-308)	1 in 1999 (1344-2975)
		Combined	82173	321	46	1 in 256 (230-286)	1 in 1786 (1340-2382)
HTT	AFR	100K GP	1211	0	0	-	-
		TOPMed	11574	16	2	1 in 723 (446-1175)	1 in 5787 (1588-21102)
	AMR	100K GP	636	0	0	-	-
		TOPMed	5037	4	1	1 in 1259 (490-3238)	1 in 5037 (890-28534)
	EAS	100K GP	294	0	0	-	-
		TOPMed	972	0	1	-	1 in 972 (172-5506)
	EUR	100K GP	29496	55	13	1 in 536 (412-698)	1 in 2269 (1326-3882)
		TOPMed	30071	38	3	1 in 791 (577-1086)	1 in 10024 (3409-29474)
	SAS	100K GP	2552	3	0	1 in 851 (290-2501)	-
		TOPMed	330	1	0	1 in 330 (59-1869)	-
	TOTAL	100K GP	34189	58	13	1 in 589 (456-762)	1 in 2630 (1537-4500)
		TOPMed	47984	59	7	1 in 813 (631-1049)	1 in 6855 (3321-14151)
		Combined	82173	117	20	1 in 702 (586-842)	1 in 4109 (2660-6346)
JPH3	AFR	100K GP	1211	4	0	1 in 303 (118-778)	-
		TOPMed	11575	47	1	1 in 246 (185-327)	1 in 11575 (2044-65573)
	AMR	100K GP	636	0	0	-	-
		TOPMed	5037	15	0	1 in 336 (204-554)	-
	EAS	100K GP	294	0	0	-	-
		TOPMed	972	0	0	-	-
	EUR	100K GP	29496	1	0	1 in 29496 (5207-167096)	-
		TOPMed	30071	0	0	-	-
	SAS	100K GP	2552	0	0	-	-
		TOPMed	330	0	0	-	-
	TOTAL	100K GP	34189	5	0	1 in 6838 (2921-16008)	-
		TOPMed	47985	62	1	1 in 774 (604-992)	1 in 47985 (8471-271838)
		Combined	82174	67	1	1 in 1226 (966-1557)	1 in 82174 (14506-465522)
NOTCH2NLC	AFR	100K GP	1211	0	0	-	-
		TOPMed	11502	0	8	-	1 in 1438 (729-2837)
	AMR	100K GP	636	0	0	-	-
		TOPMed	5034	0	5	-	1 in 1007 (430-2357)
	EAS	100K GP	293	0	0	-	-
		TOPMed	969	0	7	-	1 in 138 (67-285)
	EUR	100K GP	29472	3	0	1 in 9824 (3341-28886)	-
		TOPMed	29971	0	8	-	1 in 3746 (1899-7393)
	SAS	100K GP	2551	0	0	-	-
		TOPMed	330	0	0	-	-
	TOTAL	100K GP	34163	3	0	1 in 11388 (3873-33484)	-
		TOPMed	47806	0	28	-	1 in 1707 (1181-2467)
		Combined	81969	3	28	1 in 27323 (9293-80341)	1 in 2927 (2026-4231)
PPP2R2B	AFR	100K GP	1211	0	0	-	-
		TOPMed	11538	5	0	1 in 2308 (986-5402)	-
	AMR	100K GP	636	1	0	1 in 636 (113-3602)	-
		TOPMed	5038	1	0	1 in 5038 (890-28540)	-
	EAS	100K GP	294	1	0	1 in 294 (53-1665)	-
		TOPMed	972	0	0	-	-
	EUR	100K GP	29496	5	0	1 in 5899 (2520-13811)	-
		TOPMed	30062	5	0	1 in 6012 (2569-14076)	-
	SAS	100K GP	2552	1	0	1 in 2552 (451-14457)	-
		TOPMed	330	0	0	-	-
	TOTAL	100K GP	34189	8	0	1 in 4274 (2166-8434)	-
		TOPMed	47940	11	0	1 in 4358 (2434-7805)	-
		Combined	82129	19	0	1 in 4323 (2768-6752)	-
TBP	AFR	100K GP	1211	3	0	1 in 404 (138-1186)	-
		TOPMed	11575	55	0	1 in 210 (162-274)	-
	AMR	100K GP	636	4	0	1 in 159 (62-408)	-
		TOPMed	5037	23	0	1 in 219 (146-328)	-
	EAS	100K GP	294	5	0	1 in 59 (26-137)	-
		TOPMed	972	16	1	1 in 61 (38-98)	1 in 972 (172-5506)
	EUR	100K GP	29496	95	0	1 in 310 (254-379)	-
		TOPMed	30071	101	1	1 in 298 (245-362)	1 in 30071 (5309-170354)
	SAS	100K GP	2552	26	0	1 in 98 (67-144)	-
		TOPMed	330	5	0	1 in 66 (29-154)	-
	TOTAL	100K GP	34189	133	0	1 in 257 (217-305)	-
		TOPMed	47985	200	2	1 in 240 (209-275)	1 in 23992 (6580-87490)
		Combined	82174	333	2	1 in 247 (222-275)	1 in 41087 (11268-149826)
TOTAL				1279	290	1 in 64 (61-68)	1 in 283 (253-318)

## Sheet: TableS8
Table S8. Full mutation carrier frequency for recessive REDs (FXN and RFC1 AAGGG), per ancestry and total.
Locus	Ancestry	Cohort	Total unrel neuro excl	No.			1 in …. (95% CI) mono-allelic	1 in …. (95% CI) bi-allelic
				Normal	Mono-allelic carrier	Bi-allelic carrier
FXN	AFR	100K GP	1211	1207	4	0	1 in 303 (118-778)	-
		TOPMed	11572	11521	26	0	1 in 445 (304-652)	-
	AMR	100K GP	636	628	5	0	1 in 127 (55-297)	-
		TOPMed	5037	4997	24	0	1 in 210 (141-312)	-
	EAS	100K GP	294	294	0	0	-	-
		TOPMed	972	972	0	0	-	-
	EUR	100K GP	29497	29043	429	0	1 in 69 (63-76)	-
		TOPMed	30061	29546	318	1	1 in 95 (85-105)	1 in 30061 (5307-170297)
	SAS	100K GP	2552	2539	11	0	1 in 232 (130-415)	-
		TOPMed	330	330	0	0	-	-
	TOTAL	100K GP	34190	33711	449	0	1 in 76 (69-83)	-
		TOPMed	47972	47366	368	1	1 in 130 (118-144)	1 in 47972 (8469-271765)
		Combined	82162	81077	817	1	1 in 101 (94-108)	1 in 82162 (14504-465454)
RFC1	AFR	100K GP	1211	1203	8	0	1 in 151.38 (89.54-489.37)	-
	AMR	100K GP	636	598	34	4	1 in 18.71 (14.1-27.8)	1 in 159 (80.43-6887.11)
	EAS	100K GP	294	280	14	0	1 in 21 (13.9-42.96)	-
	EUR	100K GP	29496	27091	2361	44	1 in 12.49 (12.03-13)	1 in 670.39 (517.57-951.25)
	SAS	100K GP	2552	2478	74	0	1 in 34.49 (28.16-44.47)	-
	TOTAL	100K GP	34189	31650	2491	48	1 in 13.73 (13.23-14.26)	1 in 712.29 (555.31-993.02)

## Sheet: TableS9
Table S9. Summary of de-identified non-neurological disease participants in the 100K GP and TOPMed cohorts carrying a repeat allele larger than the full mutation range for autosomal dominant and X-linked loci (Table S7), and biallelic expansions in Table S8.
Inheritance	Locus	Repeat_size(Longest allele)	Age	Sex	Count
X-linked	AR	38	26-30	Female	2
				Male	1
			31-35	Female	1
			41-45	Female	1
			46-50	Female	4
				Male	2
			56-60	Male	1
			61-65	Female	2
			66-70	Female	2
			71-75	Female	1
			76-80	Female	2
			76-80	Male	1
			81-85	Male	1
		39	51-55	Female	2
			56-60	Male	1
			61-65	Female	3
			66-70	Female	1
		40	36-40	Female	1
			41-45	Female	1
			51-55	Female	3
			71-75	Female	1
				Male	1
			91-95	Female	1
		41	51-55	Male	1
			61-65	Female	1
				Male	1
			66-70	Female	2
		42	61-65	Female	1
		43	21-25	Female	1
			31-35	Female	1
			51-55	Female	1
		44	66-70	Female	1
		45	61-65	Female	1
Autosomal dominant	ATN1	54	61-65	Female	1
	ATXN1	44	51-55	Female	1
			66-70	Male	2
			76-80	Male	2
			91-95	Female	1
				Male	1
		45	21-25	Male	1
			26-30	Female	1
			41-45	Male	1
			61-65	Female	1
				Female	1
		46	71-75	Female	1
	ATXN2	35	36-40	Male	1
			41-45	Female	1
			71-75	Female	1
				Male	1
		36	21-25	Female	1
			41-45	Male	1
			56-60	Female	1
				Male	1
			61-65	Male	1
		37	31-35	Male	1
			56-60	Female	1
			61-65	Female	1
			66-70	Female	2
		38	46-50	Male	1
			61-65	Male	1
	ATXN7	37	61-65	Female	1
		44	46-50	Female	1
	C9orf72	32	56-60	Female	1
			76-80	Male	1
		33	31-35	Female	1
			46-50	Female	1
			51-55	Female	1
				Male	1
			61-65	Female	1
		34	41-45	Male	1
			51-55	Female	1
		35	16-20	Female	1
			66-70	Female	1
				Male	1
		36	46-50	Male	1
			61-65	Female	1
		37	16-20	Female	1
			31-35	Female	1
			51-55	Female	1
			61-65	Female	1
			71-75	Female	1
		38	66-70	Male	1
		39	26-30	Female	1
			36-40	Male	1
			41-45	Male	1
			56-60	Male	1
		40	56-60	Male	1
			61-65	Female	1
				Male	1
		41	31-35	Female	1
			51-55	Male	1
		42	71-75	Male	1
		43	31-35	Male	1
		44	41-45	Female	1
			51-55	Female	2
		45	31-35	Female	1
			61-65	Male	1
		46	76-80	Male	1
		47	56-60	Male	1
		48	46-50	Female	1
		49	46-50	Male	1
			61-65	Male	1
		50	66-70	Male	1
		51	56-60	Male	1
		52	31-35	Male	1
			61-65	Female	1
		53	46-50	Male	1
		54	2024-06-10	Female	1
			36-40	Male	1
		55	16-20	Female	1
			36-40	Female	1
		56	56-60	Female	1
		60	51-55	Female	1
		61	61-65	Male	1
		64	56-60	Male	1
		91	61-65	Female	1
		98	46-50	Male	1
		147	66-70	Male	1
		203	51-55	Male	1
		285	21-25	Female	1
		322	71-75	Female	1
		341	56-60	Male	1
		352	56-60	Female	1
		376	41-45	Male	1
		382	76-80	Female	1
		386	56-60	Male	1
		391	31-35	Female	1
		409	21-25	Female	1
		429	61-65	Male	1
		434	51-55	Male	1
		435	46-50	Female	1
		481	61-65	Female	1
		494	71-75	Male	1
		495	51-55	Male	1
		521	61-65	Female	1
		550	61-65	Male	1
		561	61-65	Male	1
		565	66-70	Female	1
		571	51-55	Female	1
		583	41-45	Male	1
		656	46-50	Female	1
		697	66-70	Male	1
		698	51-55	Male	1
		716	51-55	Male	1
		729	61-65	Female	1
		730	71-75	Female	1
		792	51-55	Male	1
		814	51-55	Female	1
		909	71-75	Female	1
		919	56-60	Female	1
		942	51-55	Male	1
		959	51-55	Female	1
		968	66-70	Male	1
		1004	66-70	Female	1
		1068	51-55	Male	1
		1159	71-75	Female	1
		1192	56-60	Female	1
		1533	56-60	Female	1
		2110	71-75	Male	1
	CACNA1A	20	51-55	Female	1
			56-60	Male	1
			61-65	Female	2
			66-70	Male	3
		21	46-50	Female	1
			71-75	Female	1
		22	31-35	Male	1
			41-45	Female	1
			56-60	Female	1
			61-65	Female	1
			71-75	Male	1
			76-80	Male	2
	DMPK	52	61-65	Female	1
			66-70	Male	1
		53	56-60	Female	1
			66-70	Female	1
			66-70	Male	1
		55	66-70	Female	1
		57	51-55	Female	1
			86-90	Male	1
		58	61-65	Female	1
		59	41-45	Female	1
		60	36-40	Male	1
		62	71-75	Female	1
		68	41-45	Female	1
			56-60	Male	1
		69	2024-11-15	Male	1
		72	56-60	Male	1
		79	36-40	Male	1
			46-50	Female	1
			61-65	Male	1
		82	61-65	Male	1
		83	36-40	Female	1
			71-75	Female	1
		86	56-60	Male	1
		87	41-45	Female	1
		88	51-55	Female	1
		91	51-55	Female	1
		93	56-60	Male	1
		95	51-55	Male	1
				Female	1
		96	31-35	Female	1
		101	76-80	Male	1
		103	46-50	Male	1
			46-50	Female	1
		109	61-65	Female	1
		111	46-50	Female	1
		117	66-70	Male	1
		118	46-50	Female	1
		123	2024-11-15	Male	1
			46-50	Female	1
		127	41-45	Male	1
		129	36-40	Female	1
			66-70	Female	1
		132	41-45	Male	1
		146	56-60	Female	1
		148	61-65	Female	1
		166	41-45	Female	1
	HTT	40	51-55	Female	3
			61-65	Female	1
			66-70	Male	4
			71-75	Female	2
				Male	1
			81-85	Male	1
		41	41-45	Female	1
			46-50	Female	1
			61-65	Female	1
		42	56-60	Male	1
			Missing	Male	1
		43	41-45	Male	1
		44	46-50	Female	1
		52	31-35	Female	1
	NOTCH2NLC	56	31-35	Female	1
			46-50	Female	1
			56-60	Female	2
		57	31-35	Female	1
			66-70	Female	1
			81-85	Male	1
		58	41-45	Male	1
			46-50	Male	1
			51-55	Male	1
			56-60	Male	1
			71-75	Female	1
			71-75	Male	1
		59	41-45	Female	1
			51-55	Female	1
				Male	1
			71-75	Female	1
			76-80	Male	1
		60	41-45	Female	1
			56-60	Male	1
		61	56-60	Female	1
			71-75	Female	1
		62	61-65	Female	1
		63	51-55	Male	1
		65	76-80	Female	1
		71	61-65	Female	1
		73	76-80	Male	1
		87	71-75	Female	1
	JPH3	40	66-70	Male	1
	TBP	53	61-65	Male	1
		54	46-50	Male	1
	TOTAL				290
Autosomal recessive	FXN biallelic	>= 66 repeats	51-55	Female	1
	RFC1 biallelic	>30 repeats biallelic AAGGG	2024-01-05	Male	1
			2024-06-10	Female	1
			2024-11-15	Female	1
			16-20	Female	1
			26-30	Female	1
			31-35	Female	1
			41-45	Female	2
				Male	1
			46-50	Female	3
				Male	2
			51-55	Female	3
				Male	4
			56-60	Female	3
				Male	1
			61-65	Female	3
				Male	1
			66-70	Female	2
				Male	3
			71-75	Female	4
				Male	3
			76-80	Female	1
				Male	1
			81-85	Female	2
				Male	2
			86-90	Male	1

[truncated: 15 more sheets: TableS10, TableS11, TableS12, TableS13, TableS14, TableS15, TableS16, TableS17, TableS18, TableS19, TableS20, TableS21, TableS22, TableS23, TableS24]
